1 **Title:** Matrin 3-dependent neurotoxicity is modified by nucleic acid binding and  
2 nucleocytoplasmic localization

3

4 **Abbreviated title:** Determinants of Matrin 3-dependent neurotoxicity

5

6 **Author list:** Ahmed M. Malik<sup>1,2</sup>, Roberto A. Miguez<sup>3</sup>, Xingli Li<sup>3</sup>, Ye-Shih Ho<sup>5</sup>, Eva L.  
7 Feldman<sup>2,3,4</sup>, and Sami J. Barmada<sup>\*,2,3</sup>

8

9 **Affiliations:** <sup>1</sup>Medical Scientist Training Program, <sup>2</sup>Neuroscience Graduate Program,  
10 <sup>3</sup>Department of Neurology, <sup>4</sup>Program for Neurology Research and Discovery, University  
11 of Michigan, Ann Arbor, MI, USA 48104; <sup>5</sup>Institute of Environmental Health Sciences,  
12 Wayne State University, Detroit, MI, USA 48201

13

14 \* To whom correspondence should be addressed:

15 Sami Barmada

16 University of Michigan, Department of Neurology

17 109 Zina Pitcher Place, BSRB 5015

18 Ann Arbor, MI 48109

19 sbarmada@umich.edu

20

21

22 **ABSTRACT**

23 Abnormalities in nucleic acid processing are associated with the development of  
24 amyotrophic lateral sclerosis (ALS) and frontotemporal dementia (FTD). Mutations in  
25 *Matrin 3 (MATR3)*, a poorly understood DNA- and RNA-binding protein, cause familial  
26 ALS/FTD, and MATR3 pathology is a feature of sporadic disease, suggesting that  
27 MATR3 dysfunction is integrally linked to ALS pathogenesis. Using a primary neuron  
28 model to assess MATR3-mediated toxicity, we noted that neurons were bidirectionally  
29 vulnerable to MATR3 levels, with pathogenic MATR3 mutants displaying enhanced  
30 toxicity. MATR3's zinc finger domains partially modulated toxicity, but elimination of its  
31 RNA recognition motifs had no effect on neuronal survival, instead facilitating its self-  
32 assembly into liquid-like droplets. In contrast to other RNA-binding proteins associated  
33 with ALS, cytoplasmic MATR3 redistribution mitigated neurodegeneration, suggesting  
34 that nuclear MATR3 mediates toxicity. Our findings offer a foundation for understanding  
35 MATR3-related neurodegeneration and how nucleic acid binding functions, localization,  
36 and pathogenic mutations drive sporadic and familial disease.

## 37 INTRODUCTION

38 Amyotrophic lateral sclerosis (ALS) is a progressive neurodegenerative disorder  
39 resulting in the death of upper and lower motor neurons (Charcot and Joffroy, 1869).  
40 Mounting evidence indicates that RNA-binding proteins (RBPs) are integrally involved in  
41 the pathogenesis of ALS (Taylor et al., 2016). The majority (>95%) of ALS patients  
42 display cytoplasmic mislocalization and deposition of the RBP TDP-43 (TAR DNA/RNA-  
43 binding protein of 43 kDa) in affected tissue (Neumann et al., 2006). Moreover, over 40  
44 different ALS-associated mutations have been identified in the gene encoding TDP-43,  
45 and mutations in several different RBPs have been similarly linked to familial ALS  
46 (Kabashi et al., 2008; Kwiatkowski et al., 2009; Vance et al., 2009; Barmada and  
47 Finkbeiner, 2010; Ticozzi et al., 2011; Kim et al., 2013). These mutations often cluster in  
48 intrinsically disordered domains that facilitate reversible liquid-liquid phase separation  
49 (LLPS), thereby creating ribonucleoprotein granules important for RNA processing,  
50 shuttling of mRNAs to sites of local translation, or sequestration of transcripts during  
51 stress. Pathogenic mutations in the genes encoding TDP-43 and related RBPs, including  
52 FUS and TIA1, shift the equilibrium towards irreversible phase separation and the  
53 formation of cytoplasmic aggregates analogous to those observed in post-mortem  
54 tissues from patients with ALS (Johnson et al., 2009; Patel et al., 2015; Gopal et al.,  
55 2017; Mackenzie et al., 2017). The downstream implications of abnormal LLPS on RNA  
56 misprocessing, RBP pathology, and neurodegeneration in ALS are unknown, however.

57 Matrin 3 (MATR3) is a DNA- and RNA-binding protein with wide-ranging  
58 functions in nucleic acid metabolism including gene transcription, the DNA damage  
59 response, splicing, RNA degradation, and the sequestration of hyperedited RNAs  
60 (Belgrader et al., 1991; Hibino et al., 2000; Zhang and Carmichael, 2001; Salton et al.,  
61 2014; Coelho et al., 2015; Rajgor et al., 2016; Uemura et al., 2017). The MATR3 S85C  
62 mutation leads to autosomal dominant distal myopathy with vocal cord and pharyngeal

63 weakness (Feit et al., 1998; Senderek et al., 2009). A more recent report reclassified a  
64 subset of patients with this diagnosis as having ALS and noted several additional  
65 MATR3 mutations in individuals with ALS and frontotemporal dementia (FTD), placing  
66 MATR3 in a group of proteins implicated in familial ALS, FTD, and myopathy; other  
67 members of this family include VCP, TIA1 and hnRNPA2/B1 (Kimonis et al., 2008;  
68 Johnson et al., 2010; Kim et al., 2013; Klar et al., 2013; Johnson et al., 2014; Mackenzie  
69 et al., 2017). A total of 13 pathogenic MATR3 mutations have now been identified, most  
70 of which are located in disordered stretches of the protein (Fig. 1A) (Millecamps et al.,  
71 2014; Origone et al., 2015; Leblond et al., 2016; Xu et al., 2016; Marangi et al., 2017).  
72 Additionally, post-mortem analyses demonstrated MATR3 pathology—consisting of  
73 cytoplasmic MATR3 accumulation as well as strong nuclear immunostaining—in patients  
74 with sporadic ALS and familial disease due to *C9orf72* hexanucleotide expansions and  
75 *FUS* mutations (Dresler et al., 2017; Tada et al., 2017).

76 Together, these observations suggest that MATR3 may be a common mediator  
77 of disease even in those without *MATR3* mutations. Even so, little is known about  
78 MATR3's functions in health or in disease, and the mechanisms underlying MATR3-  
79 dependent neurotoxicity remain unclear. Here, we establish an *in vitro* model of MATR3-  
80 mediated neurodegeneration and take advantage of this model to investigate the  
81 intrinsic properties and domains of MATR3 required for toxicity. Furthermore, we  
82 examine how disease-associated MATR3 mutations affect these properties to enhance  
83 neurodegeneration.

84

## 85 **RESULTS**

86 **MATR3 levels modulate neuronal survival in an *in vitro* model of**  
87 **neurodegeneration.**

88

89 We first asked how MATR3 expression is related to neurodegeneration using  
90 longitudinal fluorescence microscopy (LFM), a sensitive high-content imaging system  
91 that we assembled for assessing neuronal function and survival at the single-cell level.  
92 As *MATR3* mutations cause a spectrum of disease that includes ALS and FTD, we  
93 modeled neurotoxicity in primary mixed cortical cultures, a system that recapitulates key  
94 features of ALS/FTD pathogenesis (Barmada et al., 2010; Barmada et al., 2014;  
95 Barmada et al., 2015). Primary neurons were transfected with diffusely localized mApple  
96 to enable visualization of neuronal cell bodies and processes by fluorescence  
97 microscopy. In addition, cells were co-transfected with constructs encoding enhanced  
98 green fluorescent protein (EGFP) or MATR3 fused with EGFP. Cultures were imaged by  
99 fluorescence microscopy at 24 h intervals for 10 days, and custom scripts used to  
100 generate uniquely labeled regions of interest (ROIs) corresponding to each cell (Fig. 1B).  
101 Rounding of the soma, retraction of neurites or loss of fluorescence indicated cell death;  
102 these criteria proved to be sensitive markers of neurodegeneration in previous studies  
103 (Arrasate and Finkbeiner, 2005). We used the time of death for individual cells to  
104 calculate an overall risk of death, expressed as a hazard ratio (HR), corresponding to the  
105 likelihood of cell death in each population relative to a control or reference group  
106 (Christensen, 1987). In doing so, we observed that MATR3(WT)-EGFP overexpression  
107 significantly increases the risk of death compared to EGFP alone, with a HR of 1.48 (Fig.  
108 1C).

109 Next, we investigated the dose-dependency of this MATR3 toxicity through two  
110 alternative but complementary approaches. Transient transfection delivers a different  
111 amount of vector to each cell, resulting in substantial variability in protein expression for  
112 individual cells. Since fluorescence intensity is directly proportional to fluorophore levels  
113 (Arrasate et al., 2004), the GFP intensity within each ROI provides an estimate of EGFP  
114 or MATR3(WT)-EGFP expression for individual neurons. Based on the GFP intensity

115 measured 24 h after transfection, we divided transfected neurons into three groups:  
116 those that expressed low, medium, and high levels of EGFP or MATR3(WT)-EGFP. We  
117 then assessed the relative survival of these groups over time, and compared the risk of  
118 death in each by Cox proportional hazards. In doing so, we noted that cells that express  
119 low EGFP levels display an increased risk of death compared to those in the medium or  
120 high EGFP expression categories, potentially due to poor protein expression by  
121 unhealthy or dying cells (Fig. 1D). We also analyzed the relationship between GFP  
122 intensity and survival using penalized splines, which approximate both linear and non-  
123 linear relationships by treating GFP intensity as a continuous variable (Miller et al., 2010;  
124 Barmada et al., 2015). In this model, increasing EGFP expression predicted improved  
125 survival, but the effect plateaued at approximately 1500 arbitrary units (AU) (Fig. 1E).  
126 These data imply that lower expression of a neutral protein such as EGFP is tied to  
127 reduced survival, consistent with the results of previous studies (Miller et al., 2010;  
128 Barmada et al., 2015).

129 To determine how MATR3(WT)-EGFP expression is related to neuronal survival,  
130 we likewise separated neurons into three groups (low, medium and high) depending on  
131 MATR3(WT)-EGFP levels and assessed survival in each group. Unlike cells expressing  
132 EGFP alone, we detected no significant difference in survival between the low, medium,  
133 and high MATR3(WT)-EGFP expression groups (Fig. 1F). Correspondingly, the  
134 penalized spline model shows no clear relationship between risk of death and  
135 MATR3(WT)-EGFP levels for cells displaying low or medium GFP intensity. However, in  
136 contrast to cells expressing EGFP alone, we noted an increase in the risk of death with  
137 high MATR3(WT)-EGFP expression (Fig. 1G), suggesting that the extended survival  
138 observed in high-expressing cells is offset by the production of a toxic protein. Taken  
139 together, these data support a dose-dependent toxicity of MATR3(WT) in primary  
140 neurons.

141 Several *MATR3* mutations have been associated with familial ALS, FTD, and  
142 hereditary distal myopathy (Senderek et al., 2009; Johnson et al., 2014; Millecamps et  
143 al., 2014; Origone et al., 2015; Leblond et al., 2016; Xu et al., 2016; Marangi et al.,  
144 2017). To determine if disease-associated *MATR3* mutations accentuate  
145 neurodegeneration, we created *MATR3*-EGFP fusion proteins harboring one of four  
146 mutations originally implicated in familial disease: S85C, F115C, P154S, and T622A  
147 (Fig. 1A). Primary rodent cortical neurons expressing these mutant *MATR3*-EGFP  
148 constructs exhibited the same granular nuclear distribution as *MATR3*(WT)-EGFP,  
149 without obvious aggregation or cytoplasmic mislocalization, consistent with prior reports  
150 (Fig. 2A) (Gallego-Iradi et al., 2015; Boehringer et al., 2017). Even so, all four displayed  
151 a subtle but significant increase in toxicity over *MATR3*(WT)-EGFP when overexpressed  
152 in primary neurons (Fig. 2B), consistent with either gain-of-function or dominant negative  
153 loss-of-function mechanisms contributing to mutant *MATR3*-associated  
154 neurodegeneration.

155 To determine if loss of endogenous *MATR3* function is sufficient for  
156 neurodegeneration, we transfected primary neurons with mApple and siRNA targeting  
157 the amino (N)-terminal coding region of rodent *Matr3* or a scrambled siRNA control.  
158 Three days after transfection, *Matr3* immunoreactivity was used to quantify efficacy of  
159 knockdown in transfected cells (Fig. 2C). Compared to scrambled siRNA-transfected  
160 cells, we noted consistent depletion of the endogenous rat *Matr3* by approximately 65%  
161 in those transfected with siRNA targeting *Matr3* (Fig. 2D). Having confirmed knockdown,  
162 we imaged a separate set of transfected cells for 10 days to assess the effect of *Matr3*  
163 knockdown on neuronal survival. In doing so, we observed a 20% increase in the risk of  
164 death upon *Matr3* depletion in comparison to scrambled siRNA (Fig. 2E). These data  
165 suggest that neurons are vulnerable to both increases and decreases in *MATR3* levels

166 and function; further, pathogenic *MATR3* mutations may elicit neurodegeneration via  
167 gain- or loss-of-function mechanisms, or through elements of both.

168

169 ***MATR3*'s zinc finger domains modulate overexpression toxicity, but its RNA**  
170 **recognition motifs mediate self-association.**

171

172 To identify the functional domains involved in *MATR3*-mediated  
173 neurodegeneration, we systematically deleted each of the annotated *MATR3* domains  
174 and evaluated subsequent toxicity upon overexpression in primary neurons (Fig. 3A).  
175 *MATR3* has two zinc-finger (ZF) domains of the C2H2 variety, which bind DNA but may  
176 also recognize RNA and/or mediate protein-protein interactions (Brayer et al., 2008;  
177 Burdach et al., 2012). Deletions of ZF1, ZF2, or both had no observable effect on  
178 *MATR3*-EGFP localization (Fig. 3B), and ZF1 deletion by itself did not significantly alter  
179 toxicity compared to full-length *MATR3*-EGFP. In contrast, ZF2 deletion, either in  
180 isolation or combined with ZF1 deletion, partially rescued *MATR3*-EGFP overexpression  
181 toxicity (Fig. 3C).

182 We next created deletion variants of *MATR3*'s RNA recognition motifs (RRMs) to  
183 test their contribution to *MATR3*-mediated neurodegeneration. As with the *MATR3* ZF  
184 domains, RRM1 and RRM2 are capable of recognizing both RNA and DNA (Inagaki et al., 1996).  
185 While deletion of RRM1 failed to affect *MATR3*-EGFP localization, we noted a striking  
186 redistribution of *MATR3*(dRRM2)-EGFP into intranuclear granules in a subset of  
187 transfected neurons (Fig. 3D). Deletion of RRM1 in combination with RRM2 produced  
188 the same phenotype, suggesting that RRM2 normally prevents such redistribution.  
189 These nuclear granules formed by *MATR3*(dRRM2)-EGFP and *MATR3*(dRRM1/2)-  
190 EGFP were uniformly spherical in shape, and their presence was accompanied by a  
191 reduction in the intensity of diffusely-distributed *MATR3* within the nucleus, suggesting



192 that they represent hyperconcentrated MATR3 puncta. Evidence from previous studies  
193 indicates that RNA recognition by MATR3 may be largely—but not solely—driven by  
194 RRM2 (Hibino et al., 2006; Salton et al., 2011). Consistent with this, our finding that  
195 RRM2 deletion induces the formation of nuclear condensates suggests that RNA binding  
196 normally keeps MATR3 diffuse by preventing an intrinsic tendency for self-association.  
197 Despite the dramatic shift in MATR3-EGFP distribution with RRM2 deletion, there was  
198 no associated change in the toxicity of MATR3-EGFP lacking RRM1, RRM2 or both in  
199 comparison to MATR3(WT)-EGFP (Fig. 3E). This finding stands in contrast to what has  
200 been observed for other ALS/FTD-associated RBPs, in which the ability to bind RNAs is  
201 a key mediator of overexpression toxicity.

202

203 **The toxicity of RNA binding-deficient MATR3 variants is highly dependent on their**  
204 **subcellular distribution**

205

206 One of the hallmarks of neurodegenerative diseases, including ALS and FTD, is  
207 the formation of protein-rich aggregates (Arai et al., 2006; Neumann et al., 2006). Prior  
208 investigations suggest that these aggregates may be toxic, innocuous, or representative  
209 of a coping response that ultimately prolongs neuronal survival (Arrasate et al., 2004;  
210 Barmada et al., 2010). To determine if the formation of nuclear puncta by  
211 MATR3(dRRM2)-EGFP and MATR3(dRRM1/2)-EGFP affected neuronal lifespan, we  
212 turned to LFM. We employed a modified version of the automated analysis script to draw  
213 ROIs around the nuclear perimeter within each transfected cell (Fig. 4A) and then  
214 calculated a coefficient of variation (CV) for the MATR3(dRRM1/2)-EGFP signal within  
215 each nuclear ROI. The CV, or the ratio of the standard deviation of GFP intensity to the  
216 mean GFP intensity for the ROI, is directly proportional to the spatial variability of  
217 fluorescence intensity within each ROI. Therefore, we reasoned that this measure might

218 be useful for rapidly and reliably identifying puncta in an unbiased and high-throughput  
219 manner. We first validated the use of CV for detecting puncta by creating a receiver-  
220 operator characteristic (ROC) curve; in doing so, we observed that a CV threshold of  
221 0.92 was 87.2% sensitive and 93.9% specific in discriminating cells with nuclear  
222 granules from those with diffuse protein (Fig. 4B). We therefore utilized this CV threshold  
223 to assess the frequency of nuclear granule formation in primary rodent cortical neurons,  
224 noting that 24 h after transfection, 23.4% (653/2734) of neurons transfected with  
225 MATR3(dRRM2)-EGFP neurons displayed nuclear granules compared to only 8.8%  
226 (153/1743) of MATR3(dRRM1/2)-EGFP cells (Fig. 4C). We also observed the time-  
227 dependent formation of nuclear granules as neurons expressed increasing amounts of  
228 MATR3-EGFP (Fig. 4D), suggesting that granule formation may be proportional to  
229 expression level. To investigate this relationship further, we identified neurons exhibiting  
230 a diffuse distribution of MATR3(dRRM2)-EGFP at day 1 and followed these cells for an  
231 additional 3 days by automated microscopy. We then measured the GFP intensity for  
232 each cell at day 1, and related this value to the risk of granule formation over the  
233 ensuing 72 h period using penalized splines models. Notably, we failed to observe a  
234 significant relationship between GFP intensity on day 1 and granule formation by day 3  
235 (Fig. 3E). We also assessed the relative change in expression level on a per-cell basis,  
236 as quantified by the ratio of GFP intensity at day 2 to the GFP intensity at day 1, to  
237 determine if the net rate of MATR3(dRRM2)-EGFP production better predicted granule  
238 formation. The probability of granule formation was directly proportional to the time-  
239 dependent change in MATR3(dRRM2)-EGFP levels (Fig. 4F), suggesting that granule  
240 formation is favored by the rapid accumulation of MATR3(dRRM2)-EGFP.

241 Our previous studies demonstrated that deletion of RRM1 or RRM1 and 2 had no  
242 effect upon the toxicity of MATR3-EGFP when expressed in primary neurons (Fig. 3E).  
243 These analyses included all neurons within a given condition, consisting of cells with

244 diffuse nuclear MATR3 as well as those with MATR3 redistributed into granules. To  
245 determine if the presence of nuclear MATR3-EGFP granules impacted the survival of  
246 neurons, we utilized the nuclear CV threshold (Fig. 4B) to divide neurons expressing  
247 MATR3(dRRM2)-EGFP and MATR3(dRRM1/2)-EGFP into three categories: cells with  
248 diffuse protein at day 1, those with granules at day 1, or all cells. We then tracked  
249 neurons in each category for the following 9 days by LFM, and compared their survival  
250 by Cox proportional hazards analysis. By these measures, neurons displaying nuclear  
251 MATR3(dRRM2)-EGFP granules fared significantly better than the population as a  
252 whole, while those exhibiting a diffuse distribution demonstrated an increased risk of  
253 death (Fig. 4G). Similar results were obtained for neurons expressing  
254 MATR3(dRRM1/2)-EGFP; here, the relative protection associated with nuclear  
255 MATR3(dRRM1/2)-EGFP granules was modest, but the toxicity of diffusely-distributed  
256 MATR3(dRRM1/2)-EGFP was more pronounced (Fig. 4H). The marked toxicity of diffuse  
257 MATR3(dRRM1/2)-EGFP may explain why so few cells with diffuse protein are seen at  
258 day 1 (Fig. 4D). Taken together, these results suggest that diffuse MATR3 is highly  
259 neurotoxic when it cannot bind RNA. Furthermore, the sequestration of RNA binding-  
260 deficit MATR3 variants into nuclear granules is associated with a survival advantage.

261

### 262 **MATR3 granules formed by deletion of the RNA-binding domains display liquid-** 263 **like properties that are affected by pathogenic mutations**

264

265 As part of their normal function, many RBPs reversibly undergo liquid-liquid  
266 phase separation (LLPS), involving the formation of droplets with liquid-like properties  
267 from diffuse or soluble proteins (Molliex et al., 2015; Murray et al., 2017). Disease-  
268 associated mutations in the genes encoding these proteins may promote LLPS or impair  
269 the reversibility of phase separation (Molliex et al., 2015; Patel et al., 2015; Conicella et

270 al., 2016). We wondered whether the intranuclear granules formed by MATR3(dRRM2)-  
271 EGFP and MATR3(dRRM1/2)-EGFP represent liquid droplets and also whether  
272 pathogenic MATR3 mutations affect the intrinsic properties of these puncta. Indeed,  
273 nuclear granules exhibited dynamic properties, not only growing in size over time but  
274 also moving freely within the nucleus and fusing if they encountered other granules (Fig.  
275 5A), indicative of liquid-like behavior.

276 We then asked if these structures displayed internal rearrangement characteristic  
277 of liquid droplets (Lin et al., 2015; Shin and Brangwynne, 2017) and whether pathogenic  
278 *MATR3* mutations affect their dynamics. To answer this, we introduced disease-  
279 associated mutations into MATR3(dRRM1/2)-EGFP, and transfected rodent primary  
280 cortical neurons with each construct (Fig. 5B). Nuclear puncta were photobleached 2-4  
281 days after transfection, and the recovery of fluorescence intensity tracked within the  
282 bleached and unbleached ROIs by laser scanning confocal microscopy. Granules  
283 formed by WT MATR3(dRRM1/2)-EGFP displayed internal rearrangement over the  
284 course of minutes consistent with liquid-like properties, as did all tested disease mutants  
285 on the dRRM1/2 background (Fig. 5C-D). The S85C mutation, however, severely slowed  
286 fluorescence recovery, suggesting reduced exchange of molecules within each droplet.  
287 Using the Stokes-Einstein equation, we calculated viscosity estimates for each  
288 MATR3(dRRM1/2)-EGFP variant based on return time and bleached area size (Fig. 5E).  
289 Consistent with the observed effect of this mutation on fluorescence recovery, the S85C  
290 mutation led to a pronounced increase in viscosity over that of WT and other disease-  
291 associated mutants.

292 We wondered whether this phenotype was specific to nuclear droplets formed by  
293 MATR3(dRRM1/2)-EGFP, or if full-length MATR3 carrying pathogenic mutations would  
294 also display reduced mobility. For this, we transfected primary neurons with full-length  
295 versions of MATR3(WT)-EGFP or disease-associated MATR3-EGFP variants and then

296 bleached a circular area in the center of the nucleus (Fig. 5F). In each case, we noted  
297 rapid return of fluorescence, and the recovery rate was unaffected by pathogenic  
298 *MATR3* point mutations (Fig. 5G). To account for the rapidity of return as well as the  
299 area of the bleached region, we calculated a diffusion coefficient (DC) for each  
300 construct. Comparison of the DCs for WT and mutant *MATR3*-EGFP variants showed no  
301 significant differences (Fig. 5H). Our data therefore suggest that the S85C point  
302 mutation—and perhaps other mutations that cluster in the N-terminal disordered  
303 domain—selectively affect the droplet properties of *MATR3*.

304

### 305 **Mapping the sequence determinants of *MATR3* localization in neurons**

306

307       Cytoplasmic inclusions composed of the RBP TDP-43 are characteristic of ALS  
308 and the majority of FTD (Arai et al., 2006; Neumann et al., 2006). Moreover, pathogenic  
309 mutations in the gene encoding TDP-43 enhance cytoplasmic mislocalization concordant  
310 with enhanced neurotoxicity, and reductions in cytoplasmic TDP-43 prolong neuronal  
311 survival (Barmada et al., 2010; Barmada et al., 2014). To determine if *MATR3*  
312 localization is likewise an important determinant of neurodegeneration, we sought to  
313 disrupt the *MATR3* nuclear localization signal (NLS). However, since multiple sequences  
314 have been associated with nuclear *MATR3* localization (Hibino et al., 2006; Hisada-Ishii  
315 et al., 2007), we systematically identified regions enriched in positively-charged amino  
316 acids (arginine, lysine) that may mediate nuclear import via importin- $\alpha$ . We then deleted  
317 each of the 7 regions defined in this manner, including two that had been identified as  
318 controlling nuclear localization in previous studies, and assessed their localization by  
319 transfection in rodent primary cortical neurons followed by fluorescence microscopy (Fig.  
320 6A).

321 Deletion of NLSs 1, 2, 3, 5, 6, and 7 had little to no effect on neuronal MATR3  
322 distribution (Fig. 6B). While the dNLS3 mutation did not change nuclear MATR3  
323 localization *per se*, it did induce the formation of many small, nuclear granules. This  
324 effect is consistent with the position of NLS3 within RRM2, and the observed formation  
325 of nuclear puncta upon RRM2 deletion (Fig. 4). In contrast, and in accord with previous  
326 studies (Hisada-Ishii et al., 2007), deletion of the bipartite NLS4 elicited a marked  
327 reduction in nuclear MATR3-EGFP accompanied by enhanced cytoplasmic localization  
328 and the formation of small MATR3-EGFP granules within the cytoplasm. In DT40 and  
329 HeLa cells, both NLS4 arms were critical for MATR3 nuclear localization (Hisada-Ishii et  
330 al., 2007). To determine if this is the case in neurons, we sequentially deleted the N- and  
331 C-terminal arms (dNLS4N and dNLS4C, respectively) and tested their localization by  
332 transfection into primary cortical neurons. These studies demonstrated that the N-  
333 terminal arm is necessary and sufficient for nuclear localization, as MATR3(dNLS4N)-  
334 EGFP exhibits nuclear clearing and punctate distribution in the cytoplasm and neuronal  
335 processes, while MATR3(dNLS4C)-EGFP has the same distribution as MATR3(WT)-  
336 EGFP (Fig. 6C-D).

337 Having identified the N-terminal arm of NLS4 as the key sequence regulating  
338 MATR3 localization in neurons, we asked whether driving MATR3 into the cytoplasm by  
339 deletion of this sequence could modify toxicity. Rodent primary cortical neurons were  
340 transfected with mApple and either EGFP, MATR3(WT)-EGFP, or MATR3(dNLS4N)-  
341 EGFP and imaged at regular intervals by LFM. Automated survival analysis of neuronal  
342 populations expressing these constructs demonstrated that the dNLS4N mutation and  
343 resulting cytoplasmic localization significantly reduced MATR3-dependent toxicity  
344 compared to the MATR3(WT)-EGFP (Fig. 6E). Therefore, unlike TDP-43 and FUS, two  
345 RBPs whose cytoplasmic mislocalization are tightly tied to neurodegeneration in  
346 ALS/FTD models, cytoplasmic MATR3 retention mitigates toxicity, suggesting that

347 nuclear MATR3 functions are required for neurodegeneration (Barmada et al., 2010; Qiu  
348 et al., 2014).

349         Given the observed relationship between MATR3 localization and toxicity, we  
350 wondered if subtle changes in nucleocytoplasmic MATR3 distribution could be  
351 responsible for the increased toxicity of MATR3 bearing disease-associated mutations.  
352 Rodent primary cortical neurons transfected with each of the pathogenic MATR3-EGFP  
353 variants showed no obvious difference in subcellular localization in comparison with  
354 MATR3(WT)-EGFP (Fig. 2A). To investigate MATR3-EGFP localization in a quantitative  
355 manner, we developed a customized image-based analysis script to draw ROIs around  
356 the nucleus and soma of each neuron, measure MATR3-EGFP content separately within  
357 each compartment, and calculate a nucleocytoplasmic ratio for MATR3-EGFP in  
358 individual cells (Fig. 6F). This analysis confirmed our initial observations, showing no  
359 significant differences in the localization of mutant MATR3-EGFP variants compared to  
360 MATR3(WT)-EGFP.

361         In a complementary series of experiments, we utilized biochemical fractionation  
362 to assess the distribution of MATR3-EGFP in a human cell line. MATR3(WT)-EGFP or  
363 versions of MATR3-EGFP bearing the S85C, F115C, P154S, and T622A disease-  
364 associated mutations were transfected into HEK293T cells, and the nuclear and  
365 cytoplasmic fractions subjected to SDS-PAGE and Western blotting. In agreement with  
366 single-cell data from transfected primary neurons, we noted no difference in the  
367 nucleocytoplasmic distribution of any of the MATR3-EGFP variants tested here (Fig.  
368 6G). Nevertheless, we consistently observed far less of the S85C variant in both nuclear  
369 and cytoplasmic fractions, compared to MATR3(WT)-EGFP and other disease-  
370 associated mutants. These data suggest that the S85C mutation may destabilize  
371 MATR3-EGFP; alternatively, this mutation may prevent adequate solubilization and  
372 detection of MATR3-EGFP via SDS-PAGE and Western blotting.

373

374 **A subset of pathogenic MATR3 mutations affect protein solubility but not stability**

375

376 To discriminate among these possibilities, we first investigated the turnover of  
377 WT and mutant MATR3 variants using optical pulse labeling (OPL), a technique enabling  
378 non-invasive determinations of protein clearance in living cells (Barmada et al., 2014).  
379 For these experiments, MATR3 was fused to Dendra2—a photoconvertable protein that  
380 irreversibly switches from a green to red fluorescent state upon illumination with low-  
381 wavelength light (Chudakov et al., 2007)—and expressed in primary cortical neurons.  
382 One day after transfection, neurons were illuminated with blue light to photoconvert  
383 Dendra2, and the time-dependent loss of red fluorescence signal used to calculate  
384 protein half-life (Fig. 7A). Previous studies validated the accuracy and utility of OPL for  
385 determinations of protein half-life (Barmada et al., 2014); importantly, and in contrast to  
386 biochemical techniques for calculating half-life that depend on radioactive labeling or  
387 translational inhibitors, OPL allows us to measure protein clearance on a single-cell level  
388 for thousands of neurons simultaneously (Fig. 7B). Most disease-associated mutations  
389 had little effect upon the turnover of MATR3-Dendra2 in primary cortical neurons.  
390 However, we noted subtle destabilization of MATR3(S85C)-Dendra2 in comparison to  
391 other pathogenic mutant variants and MATR3(WT)-Dendra2 (Fig. 7C-D). Even so, the  
392 magnitude of the effect was relatively small, making it unlikely that differences in protein  
393 turnover fully explain the reduced abundance of MATR3(S85C)-EGFP noted in cell  
394 lysates (Fig. 6G).

395 We next asked if the S85C mutation altered MATR3 solubility. HEK293T cells  
396 transfected with WT and mutant MATR3-EGFP variants were lysed using a harsher  
397 protocol that involved sonication in RIPA buffer; additionally, we used urea buffer to  
398 extract all RIPA-insoluble proteins. In stark contrast to mild conditions (Fig. 6G), harsher



399 lysis resulted in equivalent levels of all MATR3 variants on Western blot, suggesting that  
400 the S85C mutation reduced MATR3 solubility (Fig. 7E). Consistent with this  
401 interpretation, the urea-soluble fraction was markedly enriched for MATR3(S85C)-EGFP  
402 and modestly enriched for MATR3(T622A)-EGFP. These data show that the S85C and  
403 T622A mutations reduce the solubility of MATR3, without drastically affecting its stability.  
404 As shown in Fig. 1A, both mutations lie within areas of predicted disorder, consistent  
405 with their effects on MATR3 aggregation and solubility.

406

## 407 **DISCUSSION**

408 In this study, we modeled MATR3-mediated neurodegeneration by  
409 overexpressing WT or disease-associated MATR3 variants in primary neurons. In doing  
410 so, we found that neurons were highly susceptible to increases or decreases in MATR3  
411 levels, and disease-associated MATR3 variants exhibited enhanced toxicity in  
412 comparison to MATR3(WT). Structure-function studies demonstrated that the ZF2  
413 domain modulates overexpression-related toxicity, while RRM2 prevents MATR3 phase  
414 separation into mobile nuclear puncta. Biophysical analysis of these puncta confirmed  
415 their liquid-like nature and further indicated that the pathogenic S85C mutation  
416 substantially increased the viscosity of these structures. We also determined that the N-  
417 terminal arm of a bipartite NLS drives MATR3 nuclear localization; forcing MATR3 into  
418 the cytoplasm by deleting this sequence blocked toxicity from MATR3 overexpression.  
419 While we did not observe any differences in the distribution of pathogenic MATR3  
420 variants, we noted that the S85C mutation significantly reduced MATR3 solubility and, to  
421 a lesser extent, stability. The T622A mutant displayed similar but more muted effects on  
422 MATR3 solubility, suggesting that disease-associated mutations located in distinct  
423 MATR3 domains may operate through convergent pathogenic mechanisms.

424 Both MATR3 overexpression and knockdown elicited significant and comparable  
425 toxicity in neurons. These data suggest that neurons are bidirectionally vulnerable to  
426 changes in MATR3 levels. Post-mortem studies of MATR3 distribution in sporadic and  
427 familial ALS patients demonstrated stronger MATR3 nuclear staining as well as the  
428 presence of cytoplasmic MATR3 aggregates in motor neurons (Dreser et al., 2017; Tada  
429 et al., 2017). While the impact of these findings is unknown, MATR3 mislocalization or  
430 sequestration into aggregates may reflect a reduction in normal function, a new and  
431 abnormal function, or both. In mice, homozygous *Matr3* knockout is embryonic lethal,  
432 while heterozygous *Matr3*<sup>+/-</sup> animals demonstrate incompletely penetrant cardiac  
433 developmental abnormalities. However, *Matr3*<sup>+/-</sup> mice exhibited roughly equivalent Matr3  
434 protein levels in comparison to nontransgenic animals, complicating any conclusions  
435 regarding Matr3 loss-of-function in these models (Quintero-Rivera et al., 2015).  
436 Overexpression of human MATR3(F115C) in mice results in severe muscle disease  
437 consisting of fore- and hindlimb muscle atrophy accompanied by vacuolization (Moloney  
438 et al., 2016). These animals also displayed spinal cord gliosis and cytoplasmic MATR3  
439 redistribution in spinal motor neurons akin to changes in MATR3 localization noted in  
440 humans with ALS, although no significant neurodegeneration was observed in  
441 MATR3(F115C) transgenic mice. Our data illustrating the dose-dependency of MATR3  
442 neurotoxicity (Fig. 1) imply that MATR3(F115C) expression may be insufficient to elicit  
443 neurodegeneration in these animals. Alternatively, constitutive overexpression of  
444 MATR3(F115C) in transgenic mice may trigger compensatory mechanisms during  
445 development that promote neuronal survival.

446 MATR3 is unique among ALS/FTD-associated RBPs in possessing not just two  
447 tandem RRM domains but also two ZF domains that can bind repetitive DNA elements found in  
448 the nuclear scaffold, consistent with MATR3's localization within the nuclear matrix  
449 (Hibino et al., 1998). We attempted to identify which functional domains were important

450 for MATR3 overexpression toxicity and found that while deletion of ZF2 resulted in  
451 modest rescue, deletion of RRM2—either alone or in combination with RRM1—resulted  
452 in the formation of phase-separated intranuclear droplets. Our data therefore support a  
453 model in which RNA binding prevents MATR3 self-association into droplets. Consistent  
454 with this interpretation, we observed small, mobile MATR3 granules in the cytoplasm  
455 and neuronal processes when the bipartite NLS was disrupted (Fig. 6D). Cytoplasmic  
456 RNA concentrations are more than an order of magnitude lower than those in the  
457 nucleus, a gradient that may favor the coalescence of MATR3(dNLS4N)-EGFP into  
458 puncta within the neuronal soma and processes (Goldstein and TreScott, 1970).

459         The functional importance of the individual RRM domains for MATR3's RNA  
460 binding activity is unclear; while some studies suggest that both RRM1 and RRM2 bind  
461 RNA, other investigations indicated that RRM2 is primarily responsible for binding RNA  
462 (Hibino et al., 2006; Salton et al., 2011). Our data show that deletion of RRM2 is  
463 sufficient to elicit phase separation by MATR3, suggesting that RNA recognition by  
464 MATR3 is mediated largely by RRM2. We also noted no significant difference in the  
465 survival of neuronal populations overexpressing dRRM1, dRRM2, and dRRM1/2 variants  
466 of MATR3-EGFP, implying that RNA binding *per se* is unrelated to MATR3-mediated  
467 neurodegeneration. This interpretation is strengthened by detailed analyses of neurons  
468 expressing MATR3(dRRM2) and MATR3(dRRM1/2). When neurons with and without  
469 droplets were assessed separately, we noted that neurons exhibiting diffuse  
470 MATR3(dRRM2) or MATR3(dRRM1/2) displayed a significantly higher risk of death than  
471 those with droplets. These results imply that diffuse MATR3, when not bound to RNA,  
472 can be highly toxic. Conversely, sequestration of RNA-binding deficient MATR3 into  
473 puncta is associated with extended neuronal survival. Our data further indicate that  
474 diffuse MATR3(dRRM1/2) is more toxic than diffuse MATR3(dRRM2) (compare the  
475 diffuse population in Fig. 4G to the diffuse population in Fig. 4H). Since RRM1 may be

476 capable of recognizing some RNA even without RRM2, these observations suggest that  
477 neurodegeneration is inversely proportional to the ability of MATR3 to bind RNA when  
478 diffusely localized within the nucleus. In disease models involving related RBPs,  
479 including TDP-43 and FUS, toxicity requires the presence of RNA binding motifs as well  
480 as low-complexity domains that enable LLPS (Johnson et al., 2008; Daigle et al., 2013;  
481 Ihara et al., 2013). As with MATR3, abrogation of RNA binding may disinhibit self-  
482 association, resulting in the sequestration of otherwise toxic diffuse protein within  
483 droplets.

484         Investigating the liquid-like properties of MATR3(dRRM1/2)-EGFP droplets, we  
485 noted a selective effect of the S85C mutation on droplet viscosity. Low-complexity,  
486 intrinsically disordered domains are required for phase separation and self-assembly of  
487 RBPs. Apart from its nucleic acid binding domains, MATR3 displays a high degree of  
488 predicted disorder based on its primary amino acid sequence (Fig. 1A). The location of  
489 the S85C mutation and its effects on MATR3(dRRM2)-EGFP droplet viscosity suggest  
490 that the N-terminal disordered region of MATR3 regulates the liquid-like properties of  
491 droplets. Whether full-length MATR3 is capable of phase-separation under physiological  
492 circumstances, and what relevance this process has for disease, is currently unclear.

493         Conflicting evidence (Hibino et al., 2006; Hisada-Ishii et al., 2007) suggests that  
494 MATR3 nuclear import is driven by distinct sequences in different cell types. For  
495 example, while amino acids 701-718 are essential for nuclear localization of rat MATR3  
496 in Ac2F cells, deletion of the homologous sequence (amino acids 701-720) in human  
497 MATR3 has no effect on neuronal distribution (Fig. 6B). To identify the sequences  
498 responsible for MATR3 nuclear import within neurons, we undertook a systematic  
499 analysis of arginine/lysine-rich sequences in MATR3 resembling NLSs. In accord with an  
500 earlier report (Hisada-Ishii et al., 2017), we found that MATR3's bipartite NLS (NLS4)  
501 controlled its nuclear enrichment in neurons, but only the N-terminal arm of the NLS was

502 sufficient for MATR3 nuclear clearing and cytoplasmic distribution. Pathogenic *TARDBP*  
503 and *FUS* mutations promote cytoplasmic mislocalization of TDP-43 and FUS,  
504 respectively, and cytoplasmic enrichment of these proteins is tightly linked to toxicity  
505 (Barmada et al., 2010; Dormann et al., 2010). In stark contrast, however, we observed  
506 that cytoplasmic MATR3 redistribution extended neuronal survival, suggesting—along  
507 with the partial rescue we observed for MATR3(dZF2)-EGFP and MATR3(dZF1/2)-  
508 EGFP—that MATR3 overexpression elicits neurodegeneration through nuclear DNA  
509 binding activity, mediated at least in part by ZF2.

510           Given previously established relationships between the distribution and  
511 aggregation of RBPs and neurodegeneration in ALS models (Johnson et al., 2009;  
512 Barmada et al., 2010; Dormann et al., 2010; Igaz et al., 2011; Kim et al., 2013; Qiu et al.,  
513 2014), we wondered whether the enhanced toxicity of pathogenic MATR3 variants arises  
514 from mutation-associated changes in MATR3 localization or solubility. We noted no  
515 significant differences in the subcellular distribution of mutant MATR3 variants in  
516 comparison to MATR3(WT), but instead consistently observed reduced levels of  
517 MATR3(S85C) in transfected cell lysates. A similar pattern was noted in previous  
518 investigations and attributed to reduced MATR3(S85C) stability (Johnson et al., 2014).  
519 Using OPL, a sensitive method for measuring protein turnover *in situ* (Barmada et al.,  
520 2014; Gupta et al., 2017), we detected only a very modest shortening of MATR3(S85C)  
521 half-life compared to MATR3(WT). Nevertheless, we observed a marked change in the  
522 solubility of MATR3(S85C) and, less so, MATR3(T622A). This is in partial agreement  
523 with initial studies of MATR3(S85C) that noted equivalent amounts of MATR3(WT) and  
524 MATR3(S85C) in insoluble fractions but reduced MATR3(S85C) in the nuclear fraction  
525 (Senderek et al., 2009). Both the S85C and T622A mutations lie within domains  
526 predicted to be disordered (Fig. 1). Furthermore, both mutations disrupt potential  
527 phosphorylation sites, and phosphorylation within the intrinsically disordered domain of

528 FUS inhibits self-association of the protein through negative-negative charge repulsion  
529 between phosphate groups (Monahan et al., 2017). Of the 13 pathogenic mutations  
530 identified to date in MATR3, four (S85C, S610F, T622A, S707L) eliminate  
531 phosphorylatable residues, suggesting that inadequate phosphorylation and subsequent  
532 disinhibited self-association of MATR3 may be a conserved feature of MATR3 mutants.

533 MATR3's possesses broad functions in DNA/RNA processing (Belgrader et al.,  
534 1991; Hibino et al., 2000; Zhang and Carmichael, 2001; Salton et al., 2014; Coelho et  
535 al., 2015; Rajgor et al., 2016; Uemura et al., 2017). Its presence within cytoplasmic  
536 aggregates in approximately half of patients with sporadic ALS (Tada et al., 2017)  
537 implies that MATR3 pathology causes or is caused by cellular alterations in RNA and  
538 protein homeostasis, many of which may contribute to neurodegeneration in ALS and  
539 related disorders. Our work confirms that MATR3 is essential for maintaining neuronal  
540 survival and furthermore shows that MATR3 accumulation results in neurodegeneration  
541 in a manner that depends on its subcellular localization and ZF domains. Additional  
542 studies are required to further delineate the impact of disease-associated MATR3  
543 mutations on the function, behavior, and liquid-like properties of MATR3.

544

## 545 **MATERIALS AND METHODS**

### 546 *Plasmids*

547 Full-length human *MATR3* cDNA was obtained from Addgene (#32880) and  
548 cloned into the pCMV-Tag2B vector (Agilent Technologies, #211172, Santa Clara, CA)  
549 using BamHI and XhoI endonucleases, tagging the amino-terminus with a FLAG  
550 epitope. To generate MATR3-EGFP, the *EGFP* open reading frame with a 14 amino acid  
551 N-terminal linker was amplified from pGW1-EGFP (Arrasate et al., 2004) by PCR using  
552 forward primer AGC TAC TAG TAC TAG AGC TGT TTG GGA C and reverse primer  
553 TAT TGG GCC CCT ATT ACT TGT ACA GCT CGT CCA T. The resulting amplicon was

554 digested with SpeI and ApaI and cloned into the corresponding sites in pKS to generate  
555 pKS-EGFP. To create pKS-MATR3-EGFP, the *FLAG-MATR3* open reading frame from  
556 pCMV-Tag2B was amplified by PCR with forward primer GAT CTC TAG AGC GGC  
557 CGC CAC CAT GGA T and reverse primer AGC TAC TAG TCA TAG TTT CCT TCT  
558 TCT GTC T, digested with XbaI and SpeI, and inserted into the corresponding sites in  
559 pKS-EGFP. pGW1-MATR3-EGFP was generated by digesting pKS-MATR3-EGFP with  
560 XbaI and ApaI, purifying the ensuing fragment containing MATR3-EGFP, and inserting  
561 into the corresponding sites of pGW1. To create Dendra2-tagged MATR3 variants, the  
562 *EGFP* coding region of each construct was removed by PCR amplification of the pGW1-  
563 MATR3-EGFP vector using primers that flank the *EGFP* open reading frame. The  
564 *Dendra2* open reading frame was then removed from pGW1-Dendra2 (Barmada et al.,  
565 2014) by digestion with ApaI and MfeI, and inserted into pGW1-MATR3. All constructs  
566 were confirmed by sequencing prior to transfection in neurons and HEK293T cells.

567 Domain deletion mutants were created using Q5 Hot Start High-Fidelity DNA  
568 Polymerase (New England Biolabs, Ipswich, MA) and primers flanking the regions to be  
569 deleted for nucleic acid-binding domain (Table 1) and putative nuclear localization signal  
570 (Table 2) deletions. All disease-associated point mutations were created with site-  
571 directed mutagenesis (Table 3).

572

### 573 *Primary neuron cell culture and transfection*

574 Cortices from embryonic day (E)19-20 Long-Evans rat embryos were dissected  
575 and disassociated, and primary neurons plated at a density of  $6 \times 10^5$  cells/mL in 96-well  
576 plates, as described previously (Saudou et al., 1998). At *in vitro* day (DIV) 4-5, neurons  
577 were transfected with 100 ng of pGW1-mApple (Barmada et al., 2014) to mark cells  
578 bodies and 100 ng of an experimental construct (i.e. pGW1-MATR3-EGFP) using  
579 Lipofectamine 2000, as before (Barmada et al., 2010). Following transfection, cells were

580 placed into either Neurobasal with B27 supplement (Gibco, Waltham, MA; for all survival  
581 experiments) or NEUMO photostable medium (Cell Guidance Systems, Cambridge, UK;  
582 for optical pulse labeling experiments). For siRNA knockdown experiments, neurons  
583 were transfected with 100 ng of pGW1-mApple per well and siRNA at a final  
584 concentration of 90 nM. Cells were treated with either scrambled siRNA (Dharmacon,  
585 Lafayette, CO) or siRNA targeting the N-terminal coding region of rat Matr3 (5' GUC  
586 AUU CCA GCA GUC AUC UUU 3').

587

### 588 *Longitudinal fluorescence microscopy and automated image analysis*

589 Neurons were imaged as described previously (Barmada et al., 2015) using  
590 a Nikon (Tokyo, Japan) Eclipse Ti inverted microscope with PerfectFocus3 and a 20X  
591 objective lens. Detection was accomplished with an Andor (Belfast, UK) iXon3 897  
592 EMCCD camera or Andor Zyla4.2 (+) sCMOS camera. A Lambda XL Xenon lamp  
593 (Sutter) with 5 mm liquid light guide (Sutter Instrument, Novato, CA) was used to  
594 illuminate samples, and custom scripts written in Beanshell for use in  $\mu$ Manager  
595 controlled all stage movements, shutters, and filters. Custom ImageJ/Fiji macros and  
596 Python scripts were used to identify neurons and draw regions of interest (ROIs) based  
597 upon size, morphology, and fluorescence intensity. Criteria for marking cell death  
598 involved rounding of the soma, loss of fluorescence and degeneration of neuritic  
599 processes. Custom scripts were also used to identify and draw bounding ROIs around  
600 nuclei of transfected cells based upon MATR3-EGFP or Hoechst 33258 (ThermoFisher,  
601 Waltham, MA) fluorescence. Coefficient of variation (CV) was calculated as the standard  
602 deviation of fluorescence intensity divided by the mean fluorescence intensity within an  
603 ROI.

604



605 *Immunocytochemistry*

606           Neurons were fixed with 4% paraformaldehyde, rinsed with phosphate buffered  
607 saline (PBS), and permeabilized with 0.1% Triton X-100 in PBS. After brief treatment  
608 with 10 mM glycine in PBS, cells were placed in blocking solution (0.1% Triton X-100,  
609 2% fetal calf serum, and 3% bovine serum albumin (BSA), all in PBS) at room  
610 temperature (RT) for 1 h before incubation in primary antibody, rabbit anti-MATR3  
611 (Abcam EPR10634(B), Cambridge, UK) diluted 1:1000 in blocking solution, overnight at  
612 4 °C. Cells were then washed 3x in PBS and incubated at RT with secondary antibody,  
613 goat anti-rabbit 647 (ThermoFisher A-21245) diluted 1:1000 in blocking solution, for 1 h  
614 at RT. Following 3x rinses in PBS containing 1:5000 Hoechst 33258 dye  
615 (ThermoFisher), neurons were imaged by fluorescence microscopy, as described above.

616

617 *Fluorescence recovery after photobleaching*

618           Primary neurons were dissected as above and plated in 8-well borosilicate  
619 chambers (LAB-TEK). On DIV 3, they were transfected as before but using 200 µg of  
620 pGW1-mApple and 200 µg of pGW1-MATR3-EGFP variants per well. Cell were imaged  
621 2-4 days after transfection using a Nikon A1 confocal microscope operated by Nikon  
622 Elements, a 60X objective lens, and a heating chamber with CO<sub>2</sub> pre-warmed to 37 °C.  
623 For MATR3(dRRM1/2)-EGFP variants, an ROI corresponding to half of the granule was  
624 outlined with Elements and photobleached using a 488 nm laser set at 30% power, 1  
625 pulse per sec x 7 sec. Fluorescence recovery was monitored up to 10 min after  
626 photobleaching. For full-length MATR3 variants, ROIs for photobleaching were drawn in  
627 the center of the nucleus for each cell, and recovery was monitored for 6 min.

628           Image analysis was conducted in FIJI. Rigid body stack registration was used to  
629 fix the granules in place relative to the frame. The GFP integrated density for the whole  
630 granule was calculated from pre-bleach measurements, as was the fraction of granule

631 integrated density corresponding to the ROI to be photobleached. The decline in this  
632 fraction immediately after photobleaching was then calculated and used as the floor, and  
633 the return was plotted as the percent recovery within the ROI as a fraction of the original  
634 pre-bleach granule integrated density.

635 Recovery data were fit to the equation  $y(t) = A(1 - e^{-t/\tau})$ , where A is the return curve  
636 plateau,  $\tau$  is the time constant, and t is the time post-bleach. The fitted  $\tau$  from each curve  
637 was then used to calculate the time to half-return ( $t_{1/2}$ ) using the equation  $t_{1/2} = \ln(0.5) \cdot \tau$ .  
638 To estimate the diffusion coefficient (D) of these molecules, we used the equation  $D =$   
639  $(0.88w^2)/(4t_{1/2})$ , where w is the ROI radius (Gopal et al., 2017). This equation assumes  
640 spot bleach with a circular stimulation ROI and diffusion limited to the x-y plane. Since  
641 we could not be confident that these assumptions were met, we estimated D and  
642 downstream parameters by dividing ROI areas by  $\pi$  to approximate  $w^2$  and solving for D.  
643 This estimated value was used in the Einstein-Stokes equation,  $D = k_B T / (6\pi\eta r)$ , where  $k_B$   
644 is the Boltzmann constant, T is temperature in K,  $\eta$  is viscosity, and r is the Stokes  
645 radius of the particle. As there is no applicable structural data on MATR3, we estimated  
646 a Stokes radius of 3.13 nm by applying the MATR3(dRRM1/2)-EGFP fusion protein's  
647 combined molecular weight of 106.4 kDa to the equation  $R_{\min} = 0.66M^{1/3}$ , where  $R_{\min}$  is  
648 the minimal radius in nm of a sphere that could bound a globular protein with a  
649 molecular weight of M (Erickson, 2009). Using these constants and the estimated D for  
650 each granule, the Einstein-Stokes equation was rearranged to solve for  $\eta$ .

651 Photobleaching data from full-length MATR3-EGFP was analyzed in a similar  
652 fashion. After calculating the nuclear integrated density, the fraction attributable to  
653 photobleaching within the ROI was used for normalization. Intensity data were fit to the  
654  $y(t) = A(1 - e^{-t/\tau})$  equation,  $t_{1/2}$  values were calculated as before, and D determined by the  
655 equation  $D = (0.88w^2)/(4t_{1/2})$ .

656

657 *Nuclear/cytoplasmic fractionation and differential solubility*

658 HEK293T cells were transfected in a 6-well plate with 3 µg of DNA per well using  
659 Lipofectamine 2000 according to the manufacturer's instructions. For  
660 nuclear/cytoplasmic fractionation, cells were washed with cold PBS 24 h after  
661 transfection, collected with resuspension buffer (10 mM Tris, 10 mM NaCl, 3 mM MgCl<sub>2</sub>,  
662 pH 7.4), and transferred to a pre-chilled 1.5 mL conical tube to sit on ice for 5 min. An  
663 equal volume of resuspension buffer with 0.6% Igepal (Sigma, St. Louis, MO) was then  
664 added to rupture cell membranes and release cytoplasmic contents, with occasional  
665 inversion for 5 min on ice. Nuclei were pelleted at 100 x g at 4 °C for 10 min using a  
666 tabletop centrifuge. The supernatant (cytosolic fraction) was collected, and the nuclei  
667 were rinsed twice in resuspension buffer without Igepal. To collect nuclear fractions,  
668 pelleted nuclei were lysed in RIPA buffer (Pierce) with protease inhibitors (Roche,  
669 Mannheim, Germany) on ice for 30 min with occasional inversion. Samples were  
670 centrifuged at 9,400 x g at 4 °C for 10 min, and the supernatant was saved as the  
671 nuclear fraction.

672 For differential solubility experiments, transfected HEK293T were collected in  
673 cold PBS 24 h after transfection and transferred to a pre-chilled conical tube on ice.  
674 Cells were then centrifuged at 100 x g for 5 min at 4 °C to pellet cells, the PBS was  
675 aspirated, and cells were resuspended in RIPA buffer with protease inhibitors. Following  
676 lysis on ice for 15 min with occasional inversion, cells were sonicated at 80% amplitude  
677 with 5 sec on/5 sec off for 2 min using a Fisherbrand Model 505 Sonic Dismembrator  
678 (ThermoFisher). Samples were centrifuged at 41,415 x g for 15 min at 4 °C to pellet  
679 RIPA-insoluble material, with the supernatant removed and saved as the RIPA-soluble  
680 fraction. The RIPA-insoluble pellet was washed in RIPA once, and contents  
681 resuspended vigorously in urea buffer (7 M urea, 2 M thiourea, 4% CHAPS, 30 mM Tris,

682 pH 8.5). Samples were again centrifuged at 41,415 x g for 15 min at 4 °C, and the  
683 supernatant was saved as the RIPA-insoluble, urea-soluble fraction.

684 For SDS-PAGE, stock sample buffer (10% SDS, 20% glycerol, 0.0025%  
685 bromophenol blue, 100 mM EDTA, 1 M DTT, 20 mM Tris, pH 8) was diluted 1:10 in  
686 lysates and all samples except urea fractions were boiled for 10 min before 5-15 µg of  
687 protein were loaded onto 4-15% gradient gels (Bio-Rad, Hercules, CA). For urea  
688 fractions, total protein concentration was too low to quantify and so equal volumes of  
689 sample across conditions were mixed 1:1 with water and loaded. After electrophoresis,  
690 samples were transferred at 30 V overnight at 4 °C onto an activated 2 µm nitrocellulose  
691 membrane (Bio-Rad), blocked with 3% BSA in 0.2% Tween-20 in Tris-buffered saline  
692 (TBST), and blotted overnight at 4 °C with the following primary antibodies: rabbit anti-  
693 MATR3 (Abcam EPR10634(B)), mouse anti-GAPDH (Millipore Sigma MAB374), and  
694 rabbit anti-H2B (Novus NB100-56347), all diluted 1:1000 in 3% BSA, 0.2% TBST. The  
695 following day, blots were washed in 0.2% TBST, incubated at RT for 1 h with AlexaFluor  
696 goat anti-mouse 594 (ThermoFisher A-11005) and goat anti-rabbit 488 (ThermoFisher  
697 A-11008), both diluted 1:10,000 in 3% BSA in 0.2% TBST. Following treatment with  
698 secondary antibody, blots were washed in 0.2% TBST, placed in Tris-buffered saline,  
699 and imaged using an Odyssey CLx Imaging System (LI-COR, Lincoln, NE).

700

#### 701 *Statistical analysis*

702 Statistical analyses were performed in R or Prism 7 (GraphPad). For primary  
703 neuron survival analysis, the publically available R survival package was used to  
704 determine hazard ratios describing the relative survival among populations through Cox  
705 proportional hazards analysis. For half-life calculations, a custom R script was applied to  
706 fit log-transformed TRITC intensity data to a linear equation. Photobleaching recovery  
707 data were fit to the  $y(t) = A(1 - e^{-t/\tau})$  equation using non-linear regression in R. siRNA

708 knockdown data were plotted using Prism 7, and significance determined via the two-  
 709 tailed t-test. One-way ANOVA with Tukey's post-test was used to assess for significant  
 710 differences among nuclear/cytoplasmic ratios, viscosities, D values, and half-lives. Data  
 711 are shown as mean  $\pm$  SEM unless otherwise stated.

712 **Table 1**

| Deletion mutation | Amino acids | Primers | Sequences                          |
|-------------------|-------------|---------|------------------------------------|
| dZF1              | 288 – 322   | Forward | CTT GAA ATC TAC CCA GAA TG         |
|                   |             | Reverse | CTT CGG TAA GAG TCC ATG            |
| dZF2              | 798 – 833   | Forward | CTG AAT AAA TTG GCA GAA GAA C      |
|                   |             | Reverse | AGG TAT CAC ATA GTC TAT ACC        |
| dRRM1             | 398 – 473   | Forward | TAT AAA AGA ATA AAG AAA CCT GAA GG |
|                   |             | Reverse | GCT AGT TTC CAC TCT GCC            |
| dRRM2             | 496 – 575   | Forward | GTT CTG AGG ATT CCA AAC AG         |
|                   |             | Reverse | TCC AAG CTC TTG CTT TTG            |

713

714 **Table 2**

| Deletion mutation | Amino acids | Primers | Sequences                     |
|-------------------|-------------|---------|-------------------------------|
| dNLS1             | 146 – 171   | Forward | AGA GTA CCT AGG GAT GAT TG    |
|                   |             | Reverse | AAG CTG TAG AAG GAT TTG G     |
| dNLS2             | 473 – 479   | Forward | CCT GAA GGA AAG CCA GAT C     |
|                   |             | Reverse | CTG GGA TAA ATG AAC TCT CAC   |
| dNLS3             | 571 – 574   | Forward | CTG GTT CTG AGG ATT CCA ACC   |
|                   |             | Reverse | CTC AGA CAG GTC AAC CTT C     |
| dNLS4             | 588 – 611   | Forward | ACT GAT GGT TCC CAG AAG       |
|                   |             | Reverse | CAG TAA ATC AAT GCC TCT G     |
| dNLS5             | 701– 720    | Forward | GAG GAA CTT GAT CAA GAA AAC   |
|                   |             | Reverse | CAC AGC TTT ATC TGA TGG TTC   |
| dNLS6             | 780 – 784   | Forward | CAG CCC AAT GTT CCT GTT G     |
|                   |             | Reverse | ATA CTC ATC TGG GAT TGT ATA G |
| dNLS7             | 798 – 833   | Forward | GAA ACT ATG ACT AGT ACT AGA G |
|                   |             | Reverse | CTG ATA ATG AGG AAG GCT G     |
| dNLS4N            | 588 – 595   | Forward | TCT TAC TCT CCA GAT GGC       |
|                   |             | Reverse | CAG TAA ATC AAT GCC TCT G     |
| dNLS4C            | 608 – 611   | Forward | ACT GAT GGT TCC CAG AAG       |
|                   |             | Reverse | ATC ACT TGG AGA TTC TTT GC    |

715

716 **Table 3**

| <b>Mutation</b> | <b>Primers</b> | <b>Sequences</b>                    |
|-----------------|----------------|-------------------------------------|
| S85C            | Forward        | AAT TTG CAG TGT ATA TTT AAC ATT GG  |
|                 | Reverse        | ATG GGA AGA AGT ACT AGC AGA         |
| F115C           | Forward        | ATT TTG GCC AGC TGT GGT CTG TCT GCT |
|                 | Reverse        | GTT ACT GGC CTG GTC TGC ATC         |
| P154S           | Forward        | GAA GAA GGC TCT ACC TTG AGT TAT GG  |
|                 | Reverse        | AGT TCT CCT CCT TTT AAG CTG         |
| T622A           | Forward        | GAG AGT TCA GCC GAA GGT AAA GAA C   |
|                 | Reverse        | AGT CTT CTG GGA ACC ATC AGT         |

717

718

719

720

### **ACKNOWLEDGEMENTS**

721

We thank Dr. Stephen Lentz for his assistance with confocal microscopy, Drs.

722

Claudia Figueroa-Romero and Hilary Archbold for their experimental advice, and Brittany

723

Flores for technical assistance in assembling the manuscript.

724

The present work was supported in part by funding from the National Institutes of Health

725

(NIH) National Institute for Neurological Disorders and Stroke (NINDS) R01 NS097542

726

(S.J.B.), National Institute for Aging (NIA) P30 AG053760 (S.J.B.), and National Institute

727

of General Medical Sciences (NIGMS) T32 GM007863 (A.M.M.) and T32 NS076401

728

(A.M.M.); the Protein Folding Diseases Initiative at the University of Michigan (S.J.B.);

729

the Program for Neurology Research and Discovery (E.L.F.); and the A. Alfred Taubman

730

Medical Research Institute (S.J.B., E.L.F.). Confocal microscopy was performed at the

731

Microscopy & Image Analysis Core of the Michigan Diabetes Research Center funded

732

by NIH grant P60DK020572 from the National Institute of Diabetes and Digestive and

733

Kidney Diseases (NIDDK).

734

735

### **COMPETING INTERESTS**

736

The authors declare no competing interests.

737

738 **AUTHOR CONTRIBUTIONS**

739

740 A.M.M., Y.S.H., E.L.F., and S.J.B. designed the study; R.A.M. wrote original code for

741 data analysis; X.L. performed primary neuron isolations; Y.S.H. created all MATR3

742 constructs and identified NLS-like sequences within MATR3; A.M.M. and Y.S.H.

743 conducted neuronal survival experiments; A.M.M. performed all confocal microscopy

744 and data analysis, and assembled all figures; A.M.M. and S.J.B. wrote the manuscript;

745 A.M.M., S.J.B., Y.S.H and E.L.F. edited and revised the manuscript.

746

747 **REFERENCES**

748 Arai T, Hasegawa M, Akiyama H, Ikeda K, Nonaka T, Mori H, Mann D, Tsuchiya K,

749 Yoshida M, Hashizume Y, Oda T (2006) TDP-43 is a component of ubiquitin-

750 positive tau-negative inclusions in frontotemporal lobar degeneration and

751 amyotrophic lateral sclerosis. *Biochemical and Biophysical Research*

752 *Communications* 351:602–611.

753 Arrasate M, Finkbeiner S (2005) Automated microscope system for determining factors that

754 predict neuronal fate. *Proc Natl Acad Sci USA* 102:3840–3845.

755 Arrasate M, Mitra S, Schweitzer ES, Segal MR, Finkbeiner S (2004) Inclusion body

756 formation reduces levels of mutant huntingtin and the risk of neuronal death. *Nature*

757 431:805–810.

758 Barmada SJ, Finkbeiner S (2010) Pathogenic TARDBP mutations in amyotrophic lateral

759 sclerosis and frontotemporal dementia: disease-associated pathways. *Rev Neurosci*

760 21:251–272.

761 Barmada SJ, Ju S, Arjun A, Batarse A, Archbold HC, Peisach D, Li X, Zhang Y, Tank EMH,

762 Qiu H, Huang EJ, Ringe D, Petsko GA, Finkbeiner S (2015) Amelioration of toxicity

- 763 in neuronal models of amyotrophic lateral sclerosis by hUPF1. Proc Natl Acad Sci  
764 USA 112:7821–7826.
- 765 Barmada SJ, Serio A, Arjun A, Bilican B, Daub A, Ando DM, Tsvetkov A, Pleiss M, Li X,  
766 Peisach D, Shaw C, Chandran S, Finkbeiner S (2014) Autophagy induction  
767 enhances TDP43 turnover and survival in neuronal ALS models. Nature Chemical  
768 Biology 10:677–685.
- 769 Barmada SJ, Skibinski G, Korb E, Rao EJ, Wu JY, Finkbeiner S (2010) Cytoplasmic  
770 mislocalization of TDP-43 is toxic to neurons and enhanced by a mutation  
771 associated with familial amyotrophic lateral sclerosis. J Neurosci 30:639–649.
- 772 Belgrader P, Dey R, Berezney R (1991) Molecular cloning of Matrin 3. A 125-kilodalton  
773 protein of the nuclear matrix contains an extensive acidic domain. The Journal of  
774 Biological Chemistry 266:9893–9899.
- 775 Boehringer A, Garcia-Mansfield K, Singh G, Bakkar N, Pirrotte P, Bowser R (2017) ALS  
776 Associated Mutations in Matrin 3 Alter Protein-Protein Interactions and Impede  
777 mRNA Nuclear Export. Scientific Reports:1–14.
- 778 Brayer KJ, Kulshreshtha S, Segal DJ (2008) The protein-binding potential of C2H2 zinc  
779 finger domains. Cell Biochem Biophys 51:9–19.
- 780 Burdach J, O'Connell MR, Mackay JP, Crossley M (2012) Two-timing zinc finger  
781 transcription factors liaising with RNA. Trends Biochem Sci 37:199–205.
- 782 Charcot J-M, Joffroy A (1869) Deux cas d'atrophie musculaire progressive avec lésions de  
783 la substance grise et de faisceaux antérolatéraux de la moelle épinière. Arch  
784 Physiol Norm Pathol. 2, 744–754.
- 785 Christensen E (1987) Multivariate survival analysis using Cox's regression model.  
786 Hepatology 7:1346–1358.
- 787 Chudakov DM, Lukyanov S, Lukyanov KA (2007) Tracking intracellular protein movements  
788 using photoswitchable fluorescent proteins PS-CFP2 and Dendra2. Nat Protoc



789 2:2024–2032.

790 Coelho MB, Attig J, Bellora N, Konig J, Hallegger M, Kayikci M, Eyras E, Ule J, Smith CW  
791 (2015) Nuclear matrix protein Matrin3 regulates alternative splicing and forms  
792 overlapping regulatory networks with PTB. *The EMBO Journal* 34:653–668.

793 Conicella AE, Zerze GH, Mittal J, Fawzi NL (2016) ALS Mutations Disrupt Phase  
794 Separation Mediated by  $\alpha$ -Helical Structure in the TDP-43 Low-Complexity C-  
795 Terminal Domain. *Structure* 24:1537–1549.

796 Daigle JG, Lanson NA, Smith RB, Casci I, Maltare A, Monaghan J, Nichols CD,  
797 Kryndushkin D, Shewmaker F, Pandey UB (2013) RNA-binding ability of FUS  
798 regulates neurodegeneration, cytoplasmic mislocalization and incorporation into  
799 stress granules associated with FUS carrying ALS-linked mutations. *Human*  
800 *Molecular Genetics* 22:1193–1205.

801 Dormann D, Rodde R, Edbauer D, Bentmann E, Fischer I, Hruscha A, Than ME,  
802 Mackenzie IRA, Capell A, Schmid B, Neumann M, Haass C (2010) ALS-associated  
803 fused in sarcoma (FUS) mutations disrupt Transportin-mediated nuclear import. *The*  
804 *EMBO Journal* 29:2841–2857.

805 Dreser A, Vollrath JT, Sechi A, Johann S, Roos A, Yamoah A, Katona I, Bohlega S,  
806 Wiemuth D, Tian Y, Schmidt A, Vervoorts JOR, Dohmen M, Beyer C, Anink J,  
807 Aronica E, Troost D, Weis J, Goswami A (2017) The ALS-linked E102Q mutation in  
808 Sigma receptor-1 leads to ER stress-mediated defects in protein homeostasis and  
809 dysregulation of RNA-binding proteins. :1–17.

810 Erickson HP (2009) Size and shape of protein molecules at the nanometer level  
811 determined by sedimentation, gel filtration, and electron microscopy. *Biol Proced*  
812 *Online* 11:32–51.

813 Feit H, Silbergleit A, Schneider LB, Gutierrez JA, Fitoussi R-P, Réyès C, Rouleau GA, Brais  
814 B, Jackson CE, Beckmann JS, Seboun E (1998) Vocal Cord and Pharyngeal

815 Weakness with Autosomal Dominant Distal Myopathy: Clinical Description and  
816 Gene Localization to 5q31. *The American Journal of Human Genetics* 63:1732–  
817 1742.

818 Gallego-Irardi MC, Clare AM, Brown HH, Janus C, Lewis J, Borchelt DR (2015) Subcellular  
819 Localization of Matrin 3 Containing Mutations Associated with ALS and Distal  
820 Myopathy Pandey U, ed. *PLoS ONE* 10:e0142144–15.

821 Goldstein L, Trescott OH (1970) Characterization of RNAs that do and do not migrate  
822 between cytoplasm and nucleus. *Proc Natl Acad Sci USA* 67:1367–1374.

823 Gopal PP, Nirschl JJ, Klinman E, Holzbaur ELF (2017) Amyotrophic lateral sclerosis-linked  
824 mutations increase the viscosity of liquid-like TDP-43 RNP granules in neurons.  
825 *Proc Natl Acad Sci USA* 114:E2466–E2475.

826 Gupta R, Lan M, Mojsilovic-Petrovic J, Choi WH, Safren N, Barmada S, Lee MJ, Kalb R  
827 (2017) The Proline/Arginine Dipeptide from Hexanucleotide Repeat Expanded  
828 C9ORF72 Inhibits the Proteasome. *eNeuro* 4:ENEURO.0249–16.2017.

829 Hibino Y, Ohzeki H, Hirose N, Sugano N (1998) Involvement of phosphorylation in binding  
830 of nuclear scaffold proteins from rat liver to a highly repetitive DNA component.  
831 *Biochimica et Biophysica Acta (BBA) - Gene Structure and Expression* 1396:88–96.

832 Hibino Y, Ohzeki H, Sugano N, Hiraga K (2000) Transcription Modulation by a Rat Nuclear  
833 Scaffold Protein, P130, and a Rat Highly Repetitive DNA Component or Various  
834 Types of Animal and Plant Matrix or Scaffold Attachment Regions. *Biochemical and*  
835 *Biophysical Research Communications* 279:282–287.

836 Hibino Y, Usui T, Morita Y, Hirose N, Okazaki M, Sugano N, Hiraga K (2006) Molecular  
837 properties and intracellular localization of rat liver nuclear scaffold protein P130.  
838 *Biochimica et Biophysica Acta (BBA) - Gene Structure and Expression* 1759:195–  
839 207.

- 840 Hisada-Ishii S, Ebihara M, Kobayashi N, KITAGAWA Y (2007) Bipartite nuclear localization  
841 signal of matrin 3 is essential for vertebrate cells. *Biochemical and Biophysical*  
842 *Research Communications* 354:72–76.
- 843 Igaz LM, Kwong LK, Lee EB, Chen-Plotkin A, Swanson E, Unger T, Malunda J, Xu Y,  
844 Winton MJ, Trojanowski JQ, Lee VM-Y (2011) Dysregulation of the ALS-associated  
845 gene TDP-43 leads to neuronal death and degeneration in mice. *J Clin Invest*  
846 121:726–738.
- 847 Ihara R, Matsukawa K, Nagata Y, Kunugi H, Tsuji S, Chihara T, Kuranaga E, Miura M,  
848 Wakabayashi T, Hashimoto T, Iwatsubo T (2013) RNA binding mediates  
849 neurotoxicity in the transgenic *Drosophila* model of TDP-43 proteinopathy. *Human*  
850 *Molecular Genetics* 22:4474–4484.
- 851 Johnson BS, McCaffery JM, Lindquist S, Gitler AD (2008) A yeast TDP-43 proteinopathy  
852 model: Exploring the molecular determinants of TDP-43 aggregation and cellular  
853 toxicity. *Proc Natl Acad Sci USA* 105:6439–6444.
- 854 Johnson BS, Snead D, Lee JJ, McCaffery JM, Shorter J, Gitler AD (2009) TDP-43 is  
855 intrinsically aggregation-prone, and amyotrophic lateral sclerosis-linked mutations  
856 accelerate aggregation and increase toxicity. *The Journal of Biological Chemistry*  
857 284:20329–20339.
- 858 Johnson JO et al. (2010) Exome sequencing reveals VCP mutations as a cause of familial  
859 ALS. *Neuron* 68:857–864.
- 860 Johnson JO et al. (2014) Mutations in the Matrin 3 gene cause familial amyotrophic lateral  
861 sclerosis. *Nat Neurosci* 17:664–666.
- 862 Kabashi E, Valdmanis PN, Dion P, Spiegelman D, McConkey BJ, Vande Velde C,  
863 Bouchard J-P, Lacomblez L, Pochigaeva K, Salachas F, Pradat P-F, Camu W,  
864 Meininger V, Dupré N, Rouleau GA (2008) TARDBP mutations in individuals with  
865 sporadic and familial amyotrophic lateral sclerosis. *Nat Genet* 40:572–574.

- 866 Kim HJ et al. (2013) Mutations in prion-like domains in hnRNPA2B1 and hnRNPA1 cause  
867 multisystem proteinopathy and ALS. *Nature* 495:467–473.
- 868 Kimonis VE, Fulchiero E, Vesa J, Watts G (2008) VCP disease associated with myopathy,  
869 Paget disease of bone and frontotemporal dementia: review of a unique disorder.  
870 *Biochim Biophys Acta* 1782:744–748.
- 871 Klar J, Sobol M, Melberg A, Mäbert K, Ameer A, Johansson ACV, Feuk L, Entesarian M,  
872 Orlén H, Casar-Borota O, Dahl N (2013) Welander distal myopathy caused by an  
873 ancient founder mutation in TIA1 associated with perturbed splicing. *Hum Mutat*  
874 34:572–577.
- 875 Kwiatkowski TJ et al. (2009) Mutations in the FUS/TLS gene on chromosome 16 cause  
876 familial amyotrophic lateral sclerosis. *Science* 323:1205–1208.
- 877 Leblond CS, Gan-Or Z, Spiegelman D, Laurent SB, Szuto A, Hodgkinson A, Dionne-  
878 Laporte A, Provencher P, de Carvalho M, Orrù S, Brunet D, Bouchard J-P,  
879 Awadalla P, Dupré N, Dion PA, Rouleau GA (2016) Replication study of MATR3 in  
880 familial and sporadic amyotrophic lateral sclerosis. *Neurobiology of Aging*  
881 37:209.e17–209.e21.
- 882 Lin Y, Protter DSW, Rosen MK, Parker R (2015) Formation and Maturation of Phase-  
883 Separated Liquid Droplets by RNA-Binding Proteins. *Mol Cell* 60:208–219.
- 884 Mackenzie IR et al. (2017) TIA1 Mutations in Amyotrophic Lateral Sclerosis and  
885 Frontotemporal Dementia Promote Phase Separation and Alter Stress Granule  
886 Dynamics. *Neuron* 95:808–816.e809.
- 887 Marangi G, Lattante S, Doronzio PN, Conte A, Tasca G, Monforte M, Patanella AK, Bisogni  
888 G, Meleo E, La Spada S, Zollino M, Sabatelli M (2017) Matrin 3 variants are  
889 frequent in Italian ALS patients. *Neurobiology of Aging* 49:218.e1–218.e7.
- 890 Millecamps S, De Septenville A, Teyssou E, Daniau M, Camuzat A, Albert M, LeGuern E,  
891 Galimberti D, Brice A, Marie Y, Le Ber I, FTD-ALS1 TFRNOFA (2014) Genetic

892 analysis of matrin 3 gene in French amyotrophic lateral sclerosis patients and  
893 frontotemporal lobar degeneration with amyotrophic lateral sclerosis patients.  
894 *Neurobiology of Aging* 35:2882.e13–2882.e15.

895 Miller J, Arrasate M, Shaby BA, Mitra S, Masliah E, Finkbeiner S (2010) Quantitative  
896 relationships between huntingtin levels, polyglutamine length, inclusion body  
897 formation, and neuronal death provide novel insight into huntington's disease  
898 molecular pathogenesis. *J Neurosci* 30:10541–10550.

899 Molliex A, Temirov J, Lee J, Coughlin M, Kanagaraj AP, Kim HJ, Mittag T, Taylor JP (2015)  
900 Phase separation by low complexity domains promotes stress granule assembly  
901 and drives pathological fibrillization. *Cell* 163:123–133.

902 Moloney C, Rayaprolu S, Howard J, Fromholt S, Brown H, Collins M, Cabrera M, Duffy C,  
903 Siemienski Z, Miller D, Swanson MS, Notterpek L, Borchelt DR, Lewis J (2016)  
904 Transgenic mice overexpressing the ALS- linked protein Matrin 3 develop a  
905 profound muscle phenotype. *Acta Neuropathologica Communications*:1–12.

906 Monahan Z, Ryan VH, Janke AM, Burke KA, Rhoads SN, Zerze GH, O'Meally R, Dignon  
907 GL, Conicella AE, Zheng W, Best RB, Cole RN, Mittal J, Shewmaker F, Fawzi NL  
908 (2017) Phosphorylation of the FUS low-complexity domain disrupts phase  
909 separation, aggregation, and toxicity. *The EMBO Journal* 36:2951–2967.

910 Murray DT, Kato M, Lin Y, Thurber KR, Hung I, McKnight SL, Tycko R (2017) Structure of  
911 FUS Protein Fibrils and Its Relevance to Self-Assembly and Phase Separation of  
912 Low- Complexity Domains. *Cell* 171:615–620.e616.

913 Neumann M, Sampathu DM, Kwong LK, Truax AC, Micsenyi MC, Chou TT, Bruce J,  
914 Schuck T, Grossman M, Clark CM, McCluskey LF, Miller BL, Masliah E, Mackenzie  
915 IR, Feldman H, Feiden W, Kretzschmar HA, Trojanowski JQ, Lee VM-Y (2006)  
916 Ubiquitinated TDP-43 in frontotemporal lobar degeneration and amyotrophic lateral  
917 sclerosis. *Science* 314:130–133.

- 918 Origone P, Verdiani S, Bandettini Di Poggio M, Zuccarino R, Vignolo M, Caponnetto C,  
919 Mandich P (2015) A novel Arg147Trp MATR3 missense mutation in a slowly  
920 progressive ALS Italian patient. *Amyotrophic Lateral Sclerosis and Frontotemporal*  
921 *Degeneration* 16:530–531.
- 922 Patel A et al. (2015) A Liquid-to-Solid Phase Transition of the ALS Protein FUS Accelerated  
923 by Disease Mutation. *Cell* 162:1066–1077.
- 924 Peng K, Radivojac P, Vucetic S, Dunker AK, Obradovic Z (2006) Length-dependent  
925 prediction of protein intrinsic disorder. *BMC Bioinformatics* 7:208.
- 926 Qiu H et al. (2014) ALS-associated mutation FUS-R521C causes DNA damage and RNA  
927 splicing defects. *J Clin Invest* 124:981–999.
- 928 Quintero-Rivera F et al. (2015) MATR3 disruption in human and mouse associated with  
929 bicuspid aortic valve, aortic coarctation and patent ductus arteriosus. *Human*  
930 *Molecular Genetics* 24:2375–2389.
- 931 Rajgor D, Hanley JG, Shanahan CM (2016) Identification of novel nesprin-1 binding  
932 partners and cytoplasmic matrin-3 in processing bodies. *Mol Biol Cell* 27:3894–  
933 3902.
- 934 Salton M, Elkon R, Borodina T, Davydov A, Yaspo M-L, Halperin E, Shiloh Y (2011) Matrin  
935 3 Binds and Stabilizes mRNA Papavasiliou N, ed. *PLoS ONE* 6:e23882–e23887.
- 936 Salton M, Lerenthal Y, Wang S-Y, Chen DJ, Shiloh Y (2014) Involvement of Matrin 3 and  
937 SFPQ/NONO in the DNA damage response. *Cell Cycle* 9:1568–1576.
- 938 Saudou F, Finkbeiner S, Devys D, Greenberg ME (1998) Huntingtin acts in the nucleus to  
939 induce apoptosis but death does not correlate with the formation of intranuclear  
940 inclusions. *Cell* 95:55–66.
- 941 Senderek J et al. (2009) Autosomal-Dominant Distal Myopathy Associated with a Recurrent  
942 Missense Mutation in the Gene Encoding the Nuclear Matrix Protein, Matrin 3. *The*  
943 *American Journal of Human Genetics* 84:511–518.

- 944 Shin Y, Brangwynne CP (2017) Liquid phase condensation in cell physiology and disease.  
945 Science 357:eaaf4382–13.
- 946 Tada M, Doi H, Koyano S, Kubota S, Fukai R, Hashiguchi S, Hayashi N, Kawamoto Y,  
947 Kunii M, Tanaka K, Takahashi K, Ogawa Y, Iwata R, Yamanaka S, Takeuchi H,  
948 Tanaka F (2017) Matrin 3 is a component of neuronal cytoplasmic inclusions of  
949 motor neurons in sporadic amyotrophic lateral sclerosis. The American Journal of  
950 Pathology:1–36.
- 951 Taylor JP, Brown RH, Cleveland DW (2016) Decoding ALS: from genes to mechanism.  
952 Nature 539:197–206.
- 953 Ticozzi N, Vance C, Leclerc AL, Keagle P, Glass JD, McKenna-Yasek D, Sapp PC, Silani  
954 V, Bosco DA, Shaw CE, Brown RH, Landers JE (2011) Mutational analysis reveals  
955 the FUS homolog TAF15 as a candidate gene for familial amyotrophic lateral  
956 sclerosis. Am J Med Genet B Neuropsychiatr Genet 156B:285–290.
- 957 Uemura Y, Oshima T, Yamamoto M, Reyes CJ, Costa Cruz PH, Shibuya T, Kawahara Y  
958 (2017) Matrin3 binds directly to intronic pyrimidine-rich sequences and controls  
959 alternative splicing. Genes Cells 22:785–798.
- 960 Vance C et al. (2009) Mutations in FUS, an RNA processing protein, cause familial  
961 amyotrophic lateral sclerosis type 6. Science 323:1208–1211.
- 962 Xu L, Li J, Tang L, Zhang N, Fan D (2016) MATR3 mutation analysis in a Chinese cohort  
963 with sporadic amyotrophic lateral sclerosis. Neurobiology of Aging 38:218.e3–  
964 218.e4.
- 965 Zhang Z, Carmichael GG (2001) The Fate of dsRNA in the Nucleus: A p54nrb-Containing  
966 Complex Mediates the Nuclear Retention of Promiscuously A-to-I Edited RNAs. Cell  
967 106:465–476.

## Figure 1

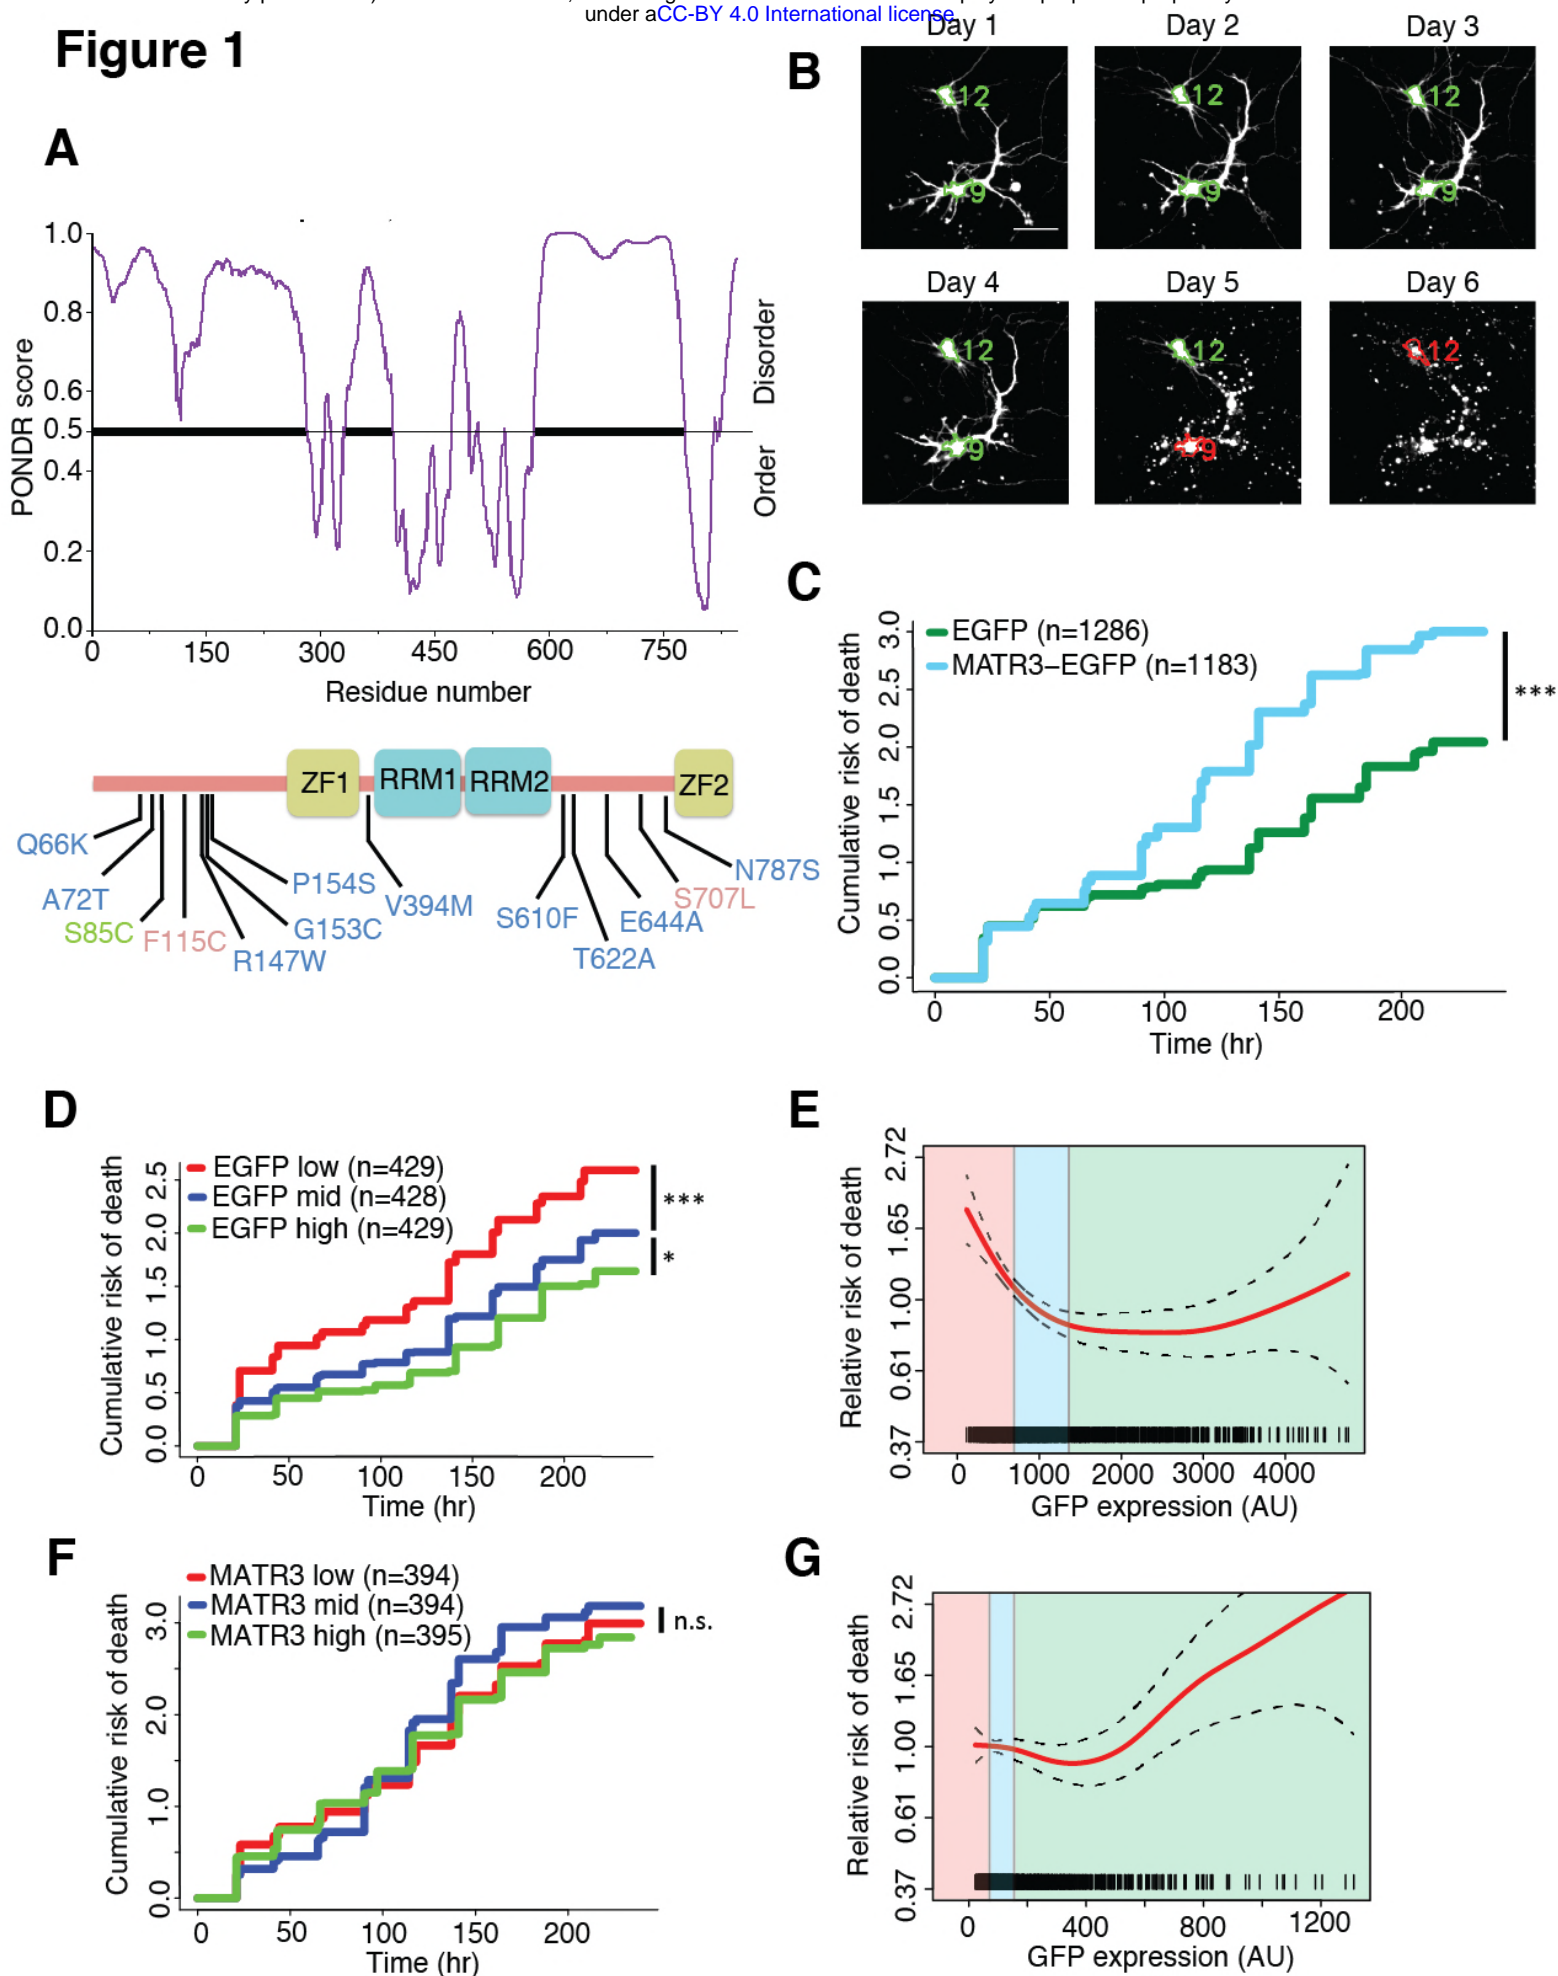



## Figure 2

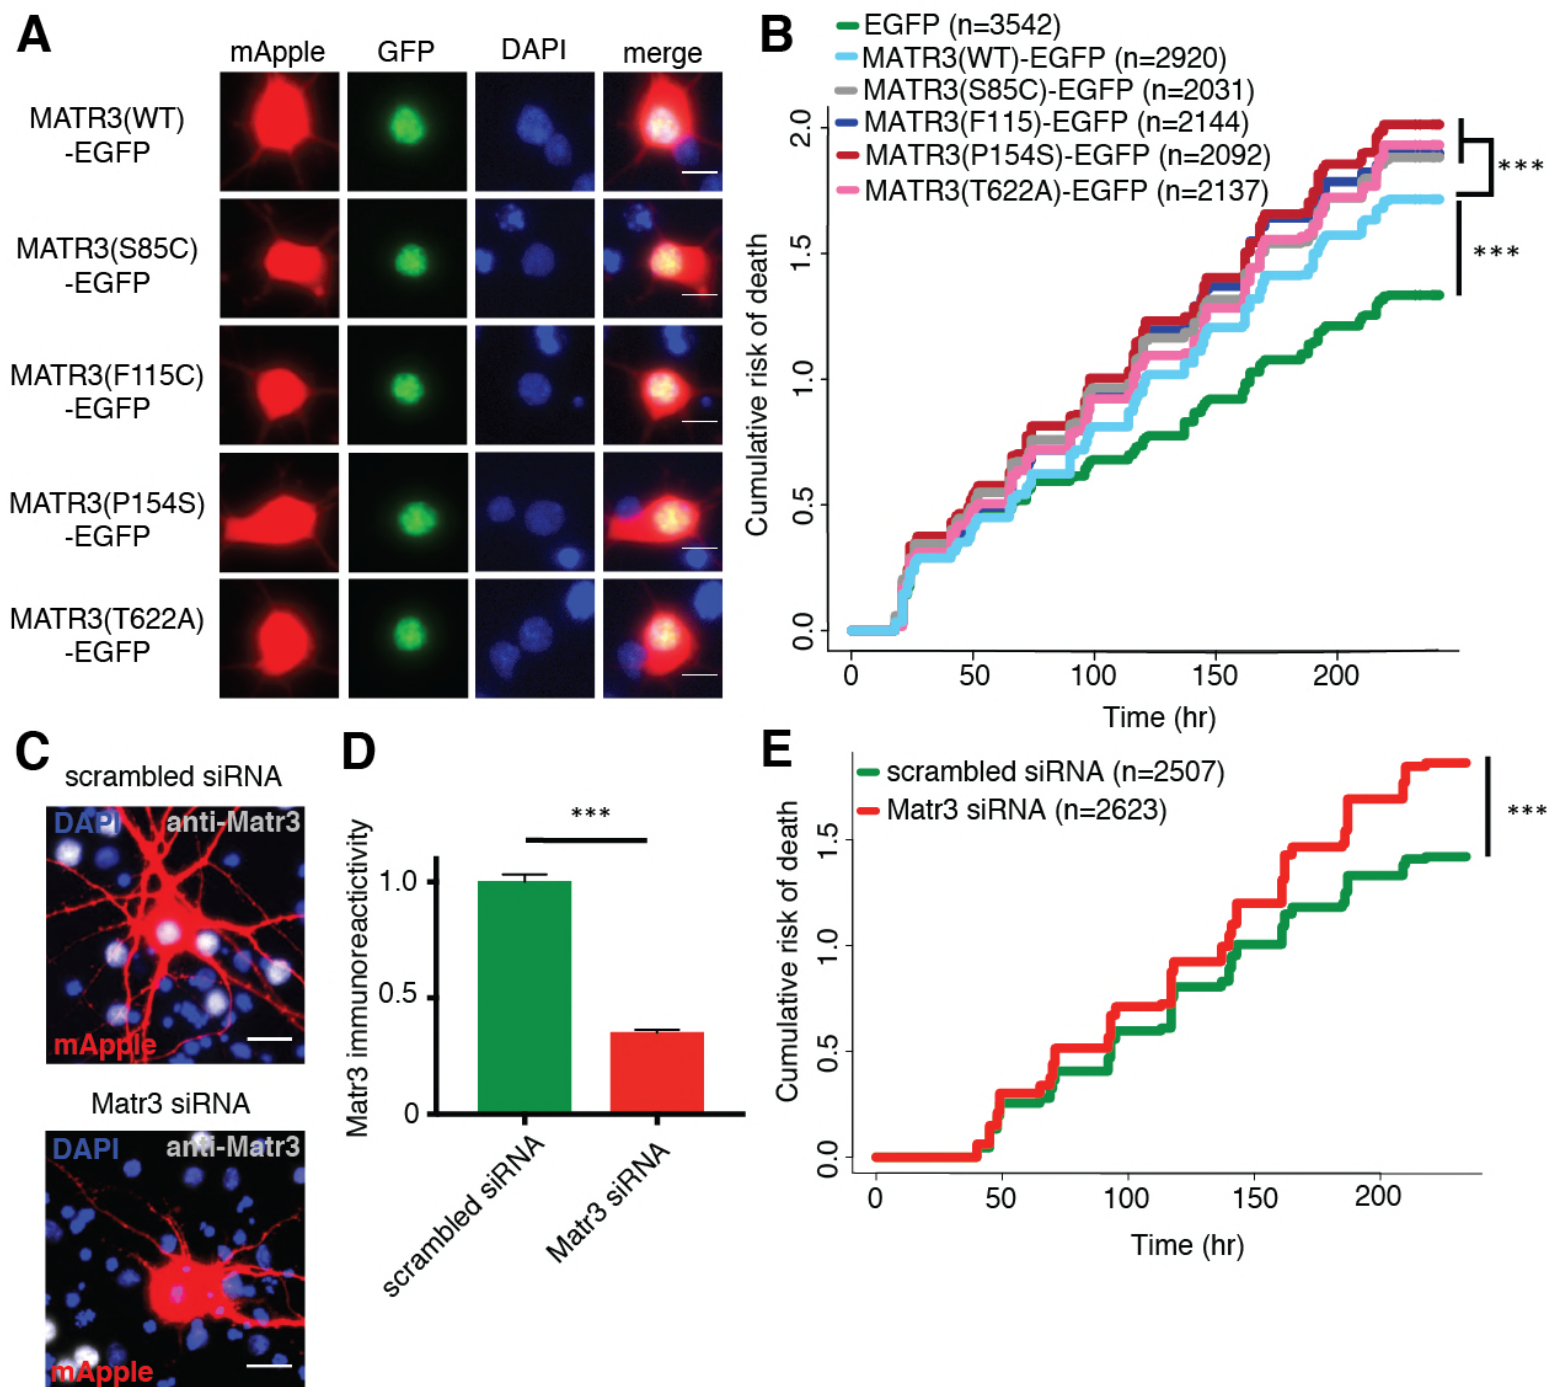

## Figure 3

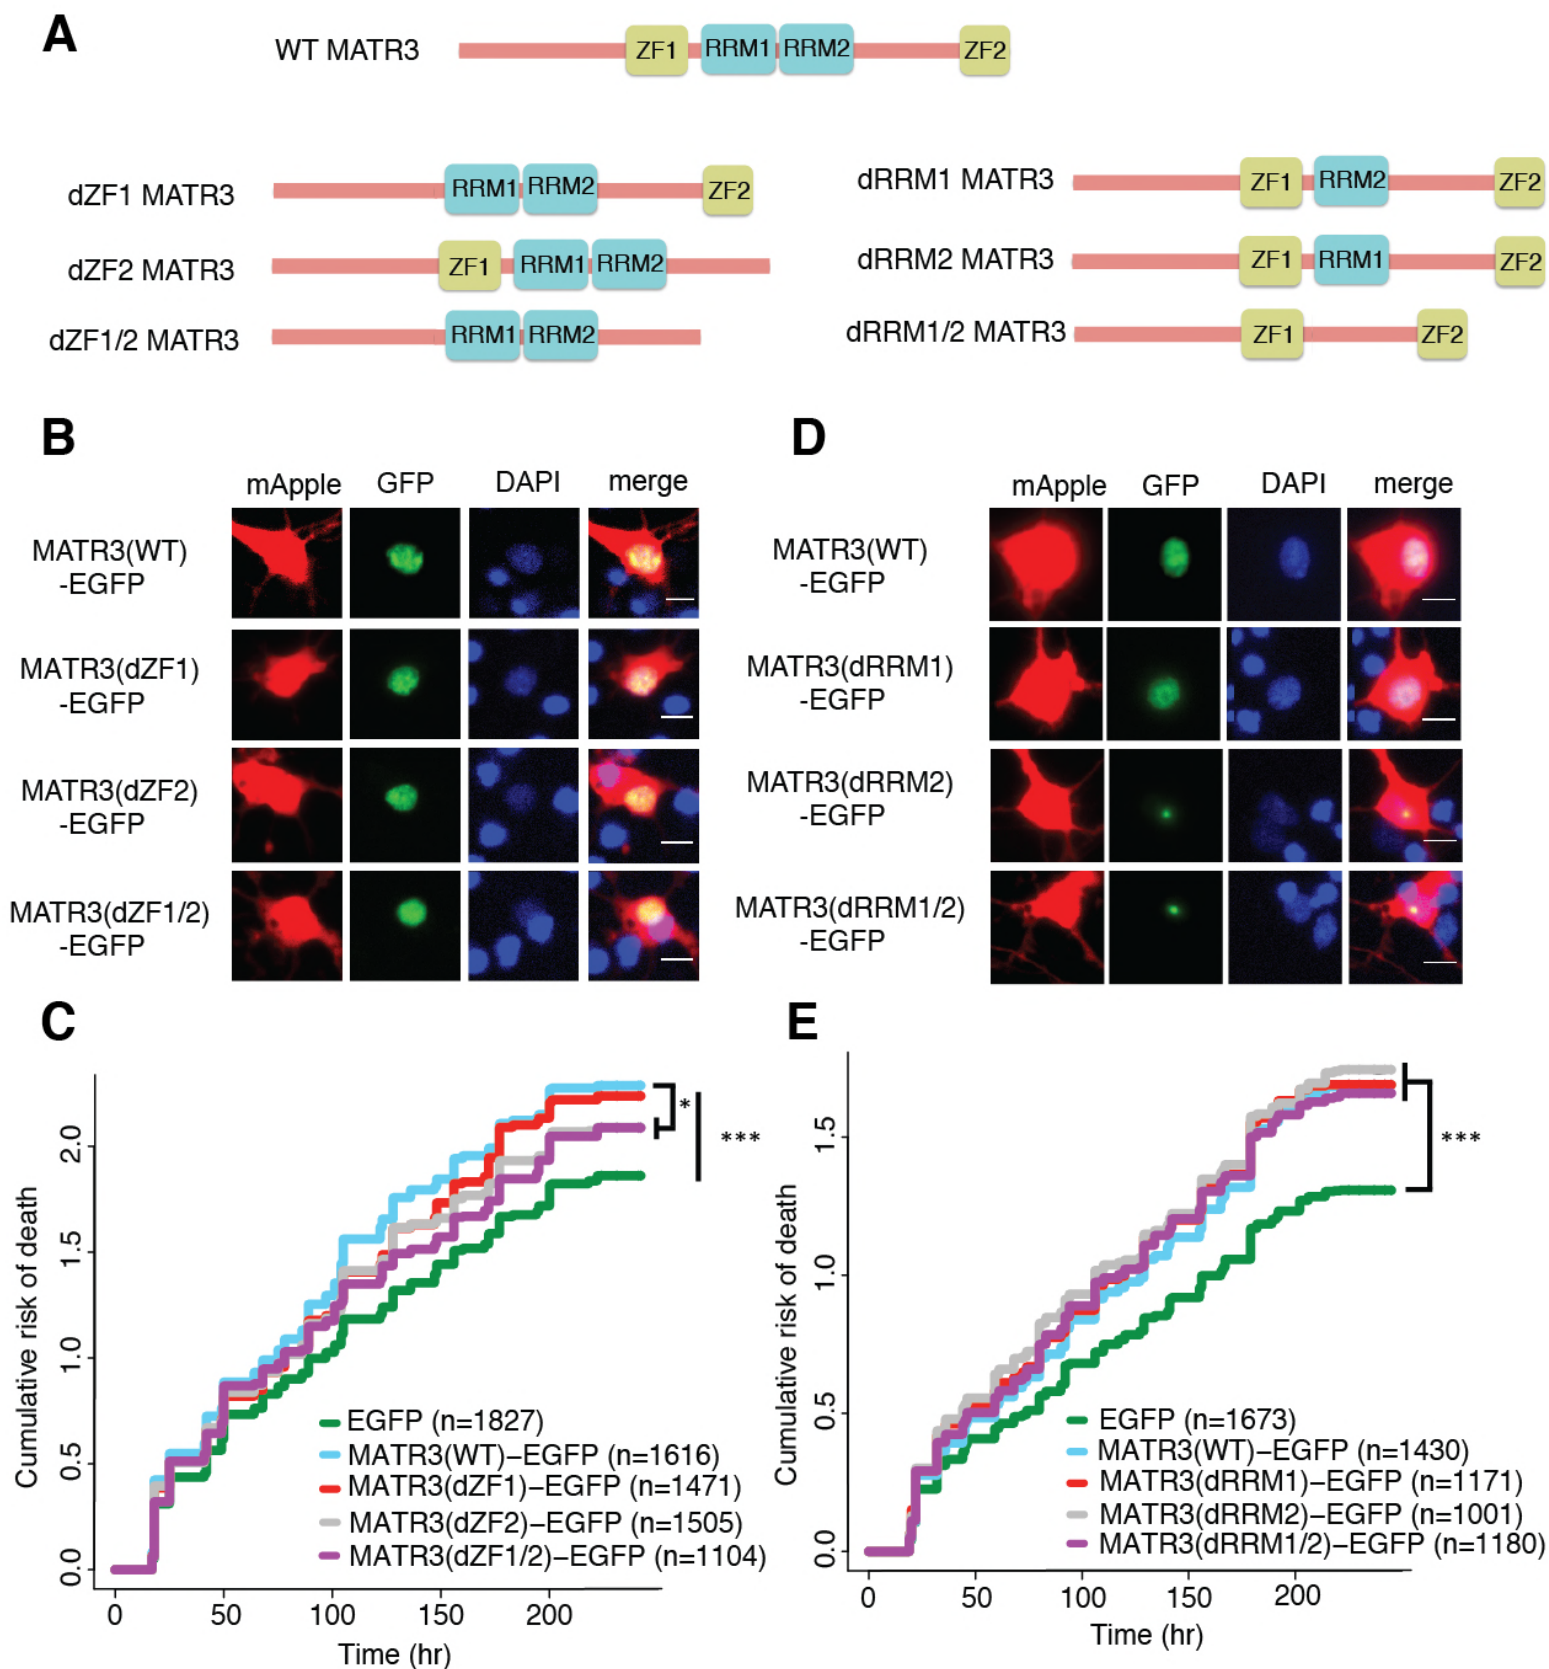

## Figure 4

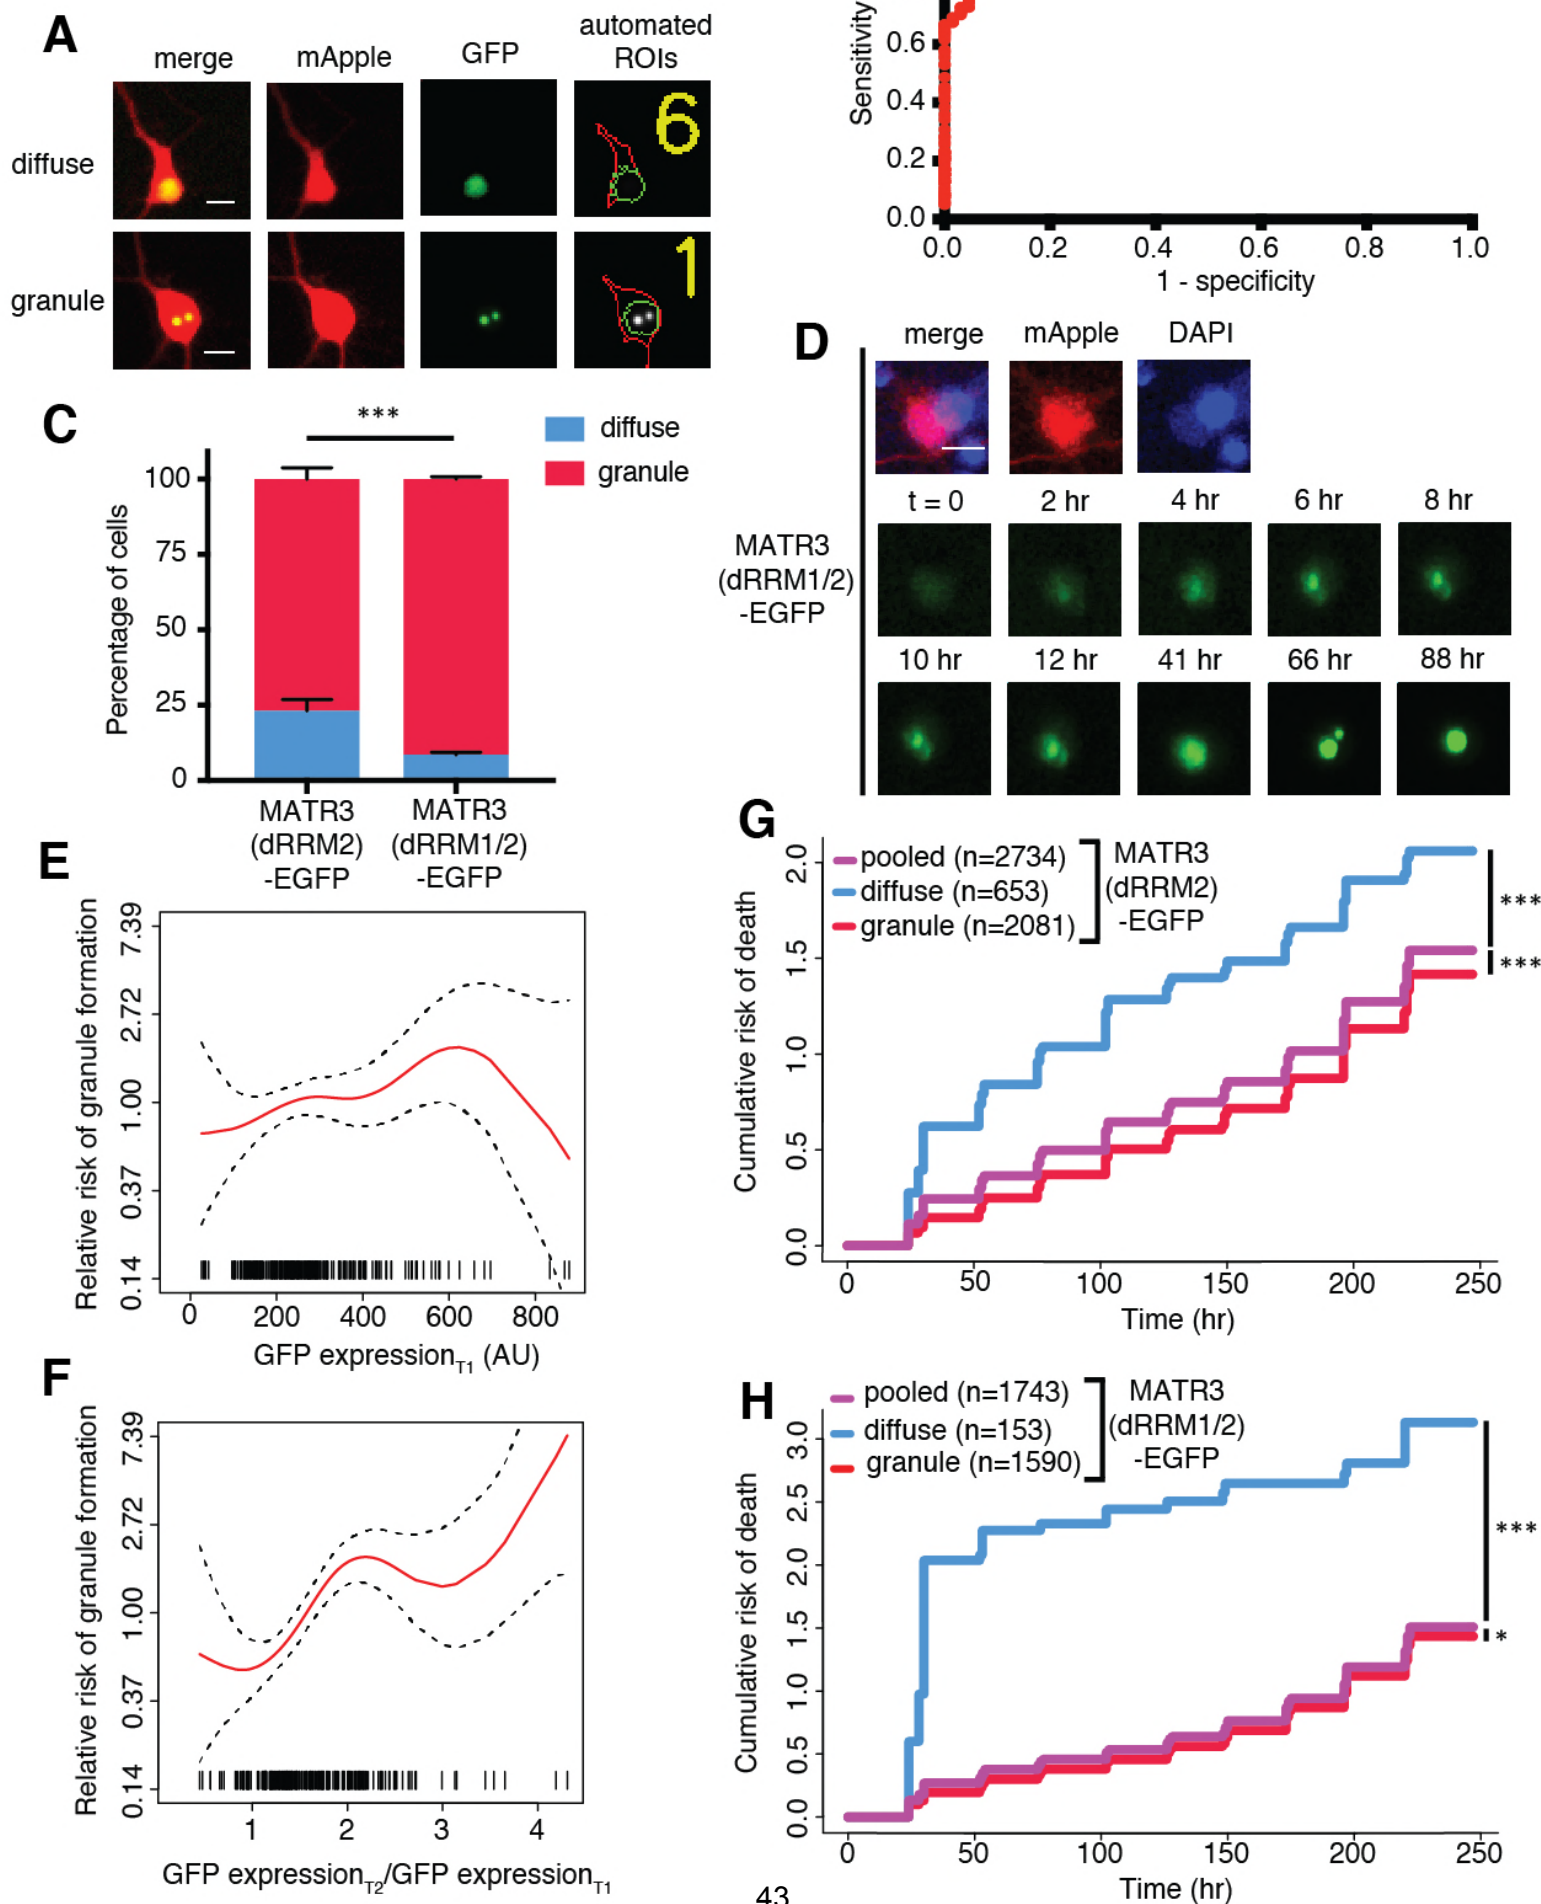

## Figure 5

### A

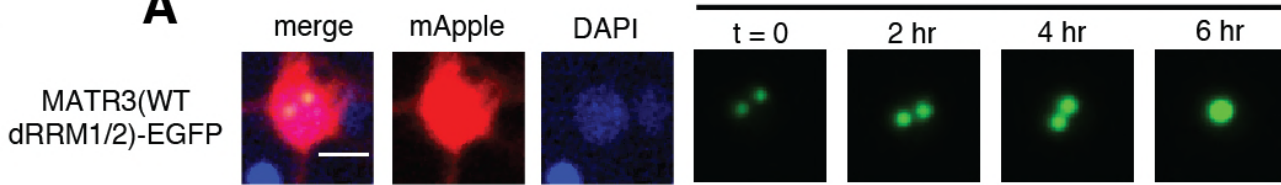

### B

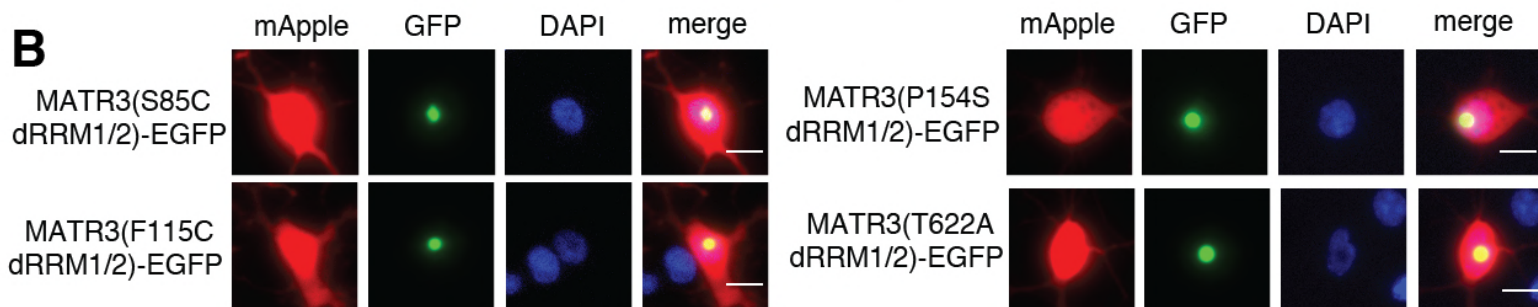

### C

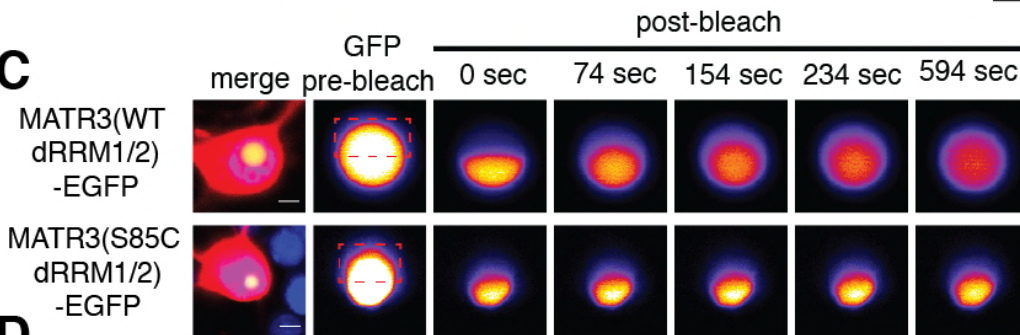

### D

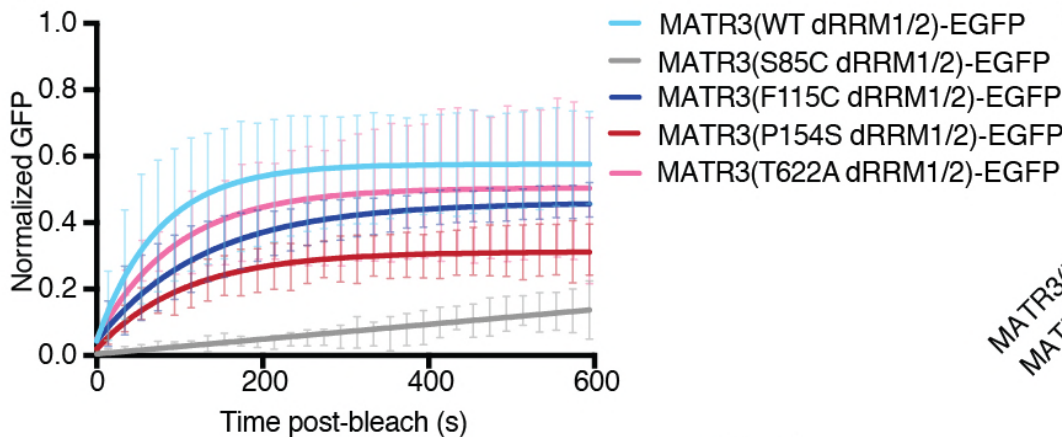

### E

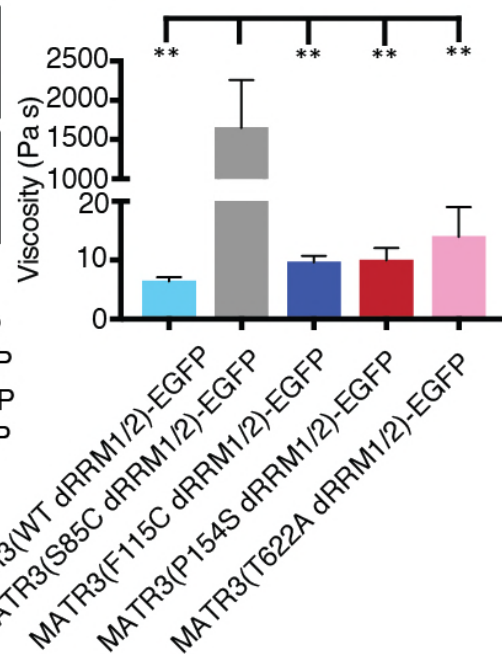

### F

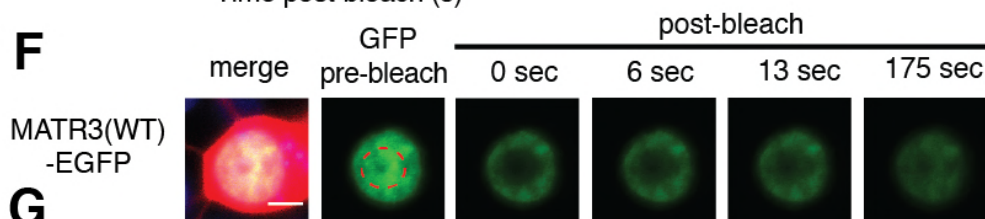

### G

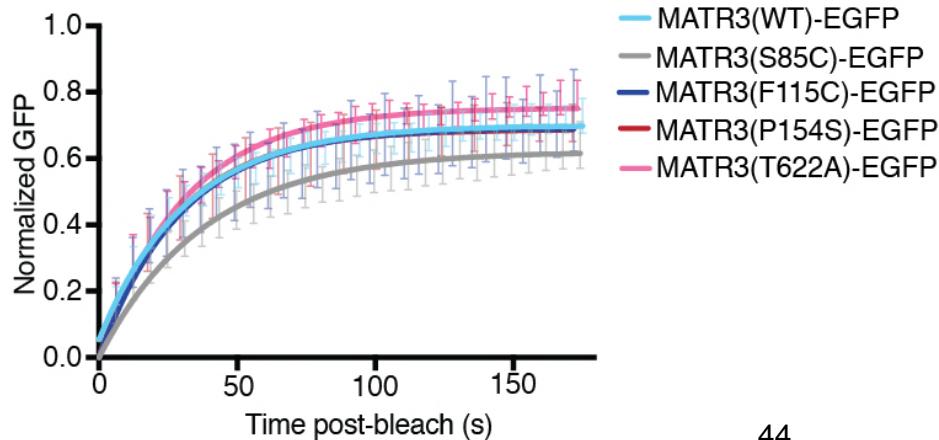

### H

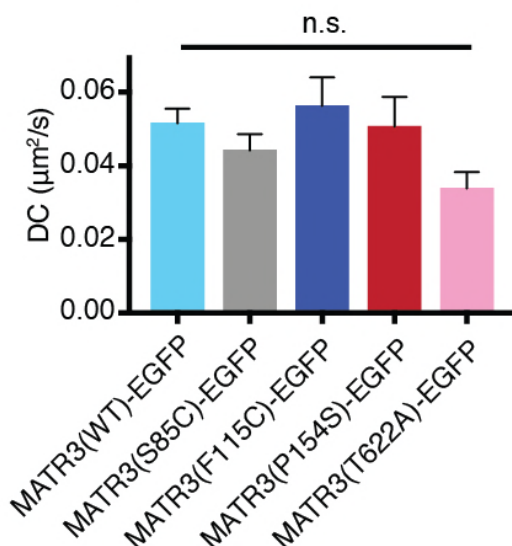

## Figure 6

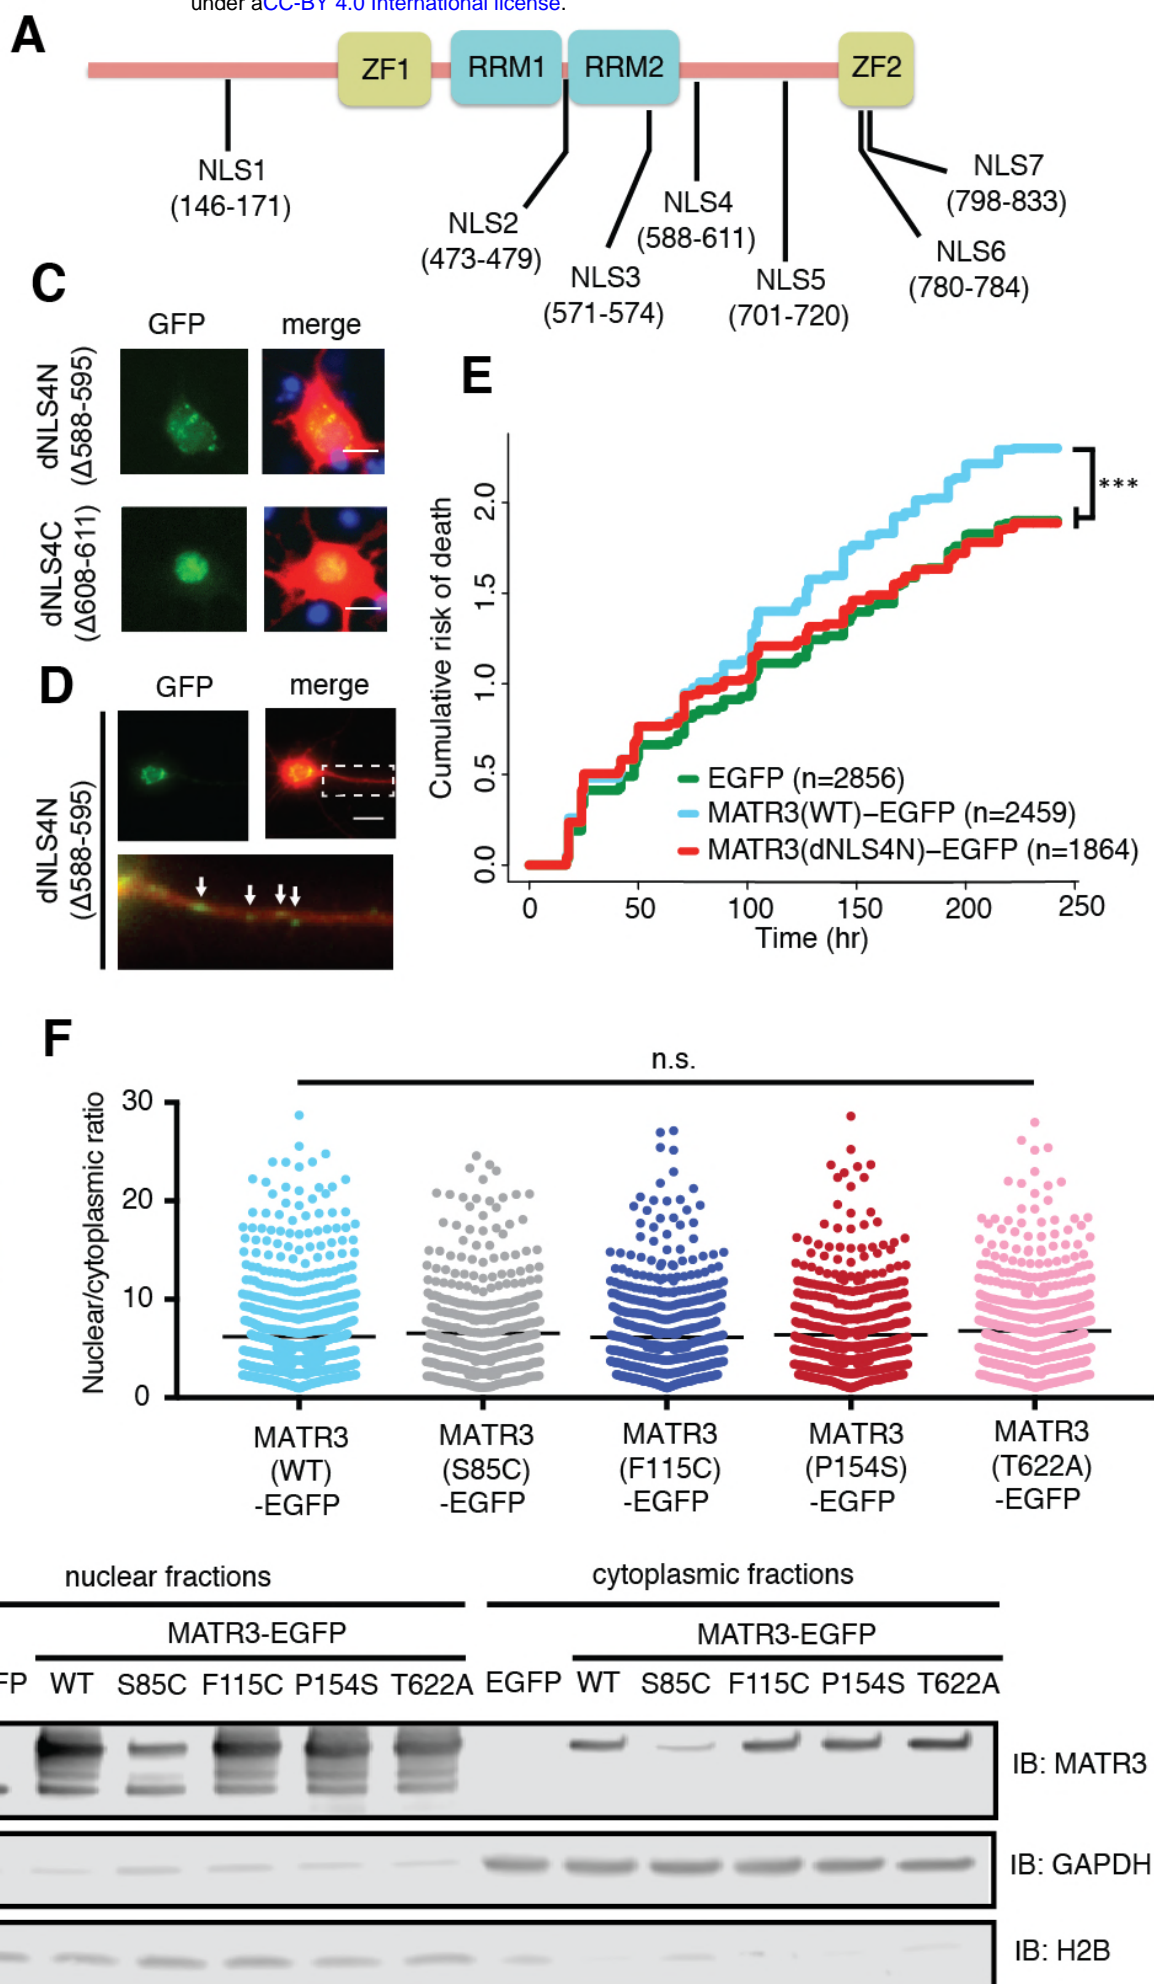

## Figure 7

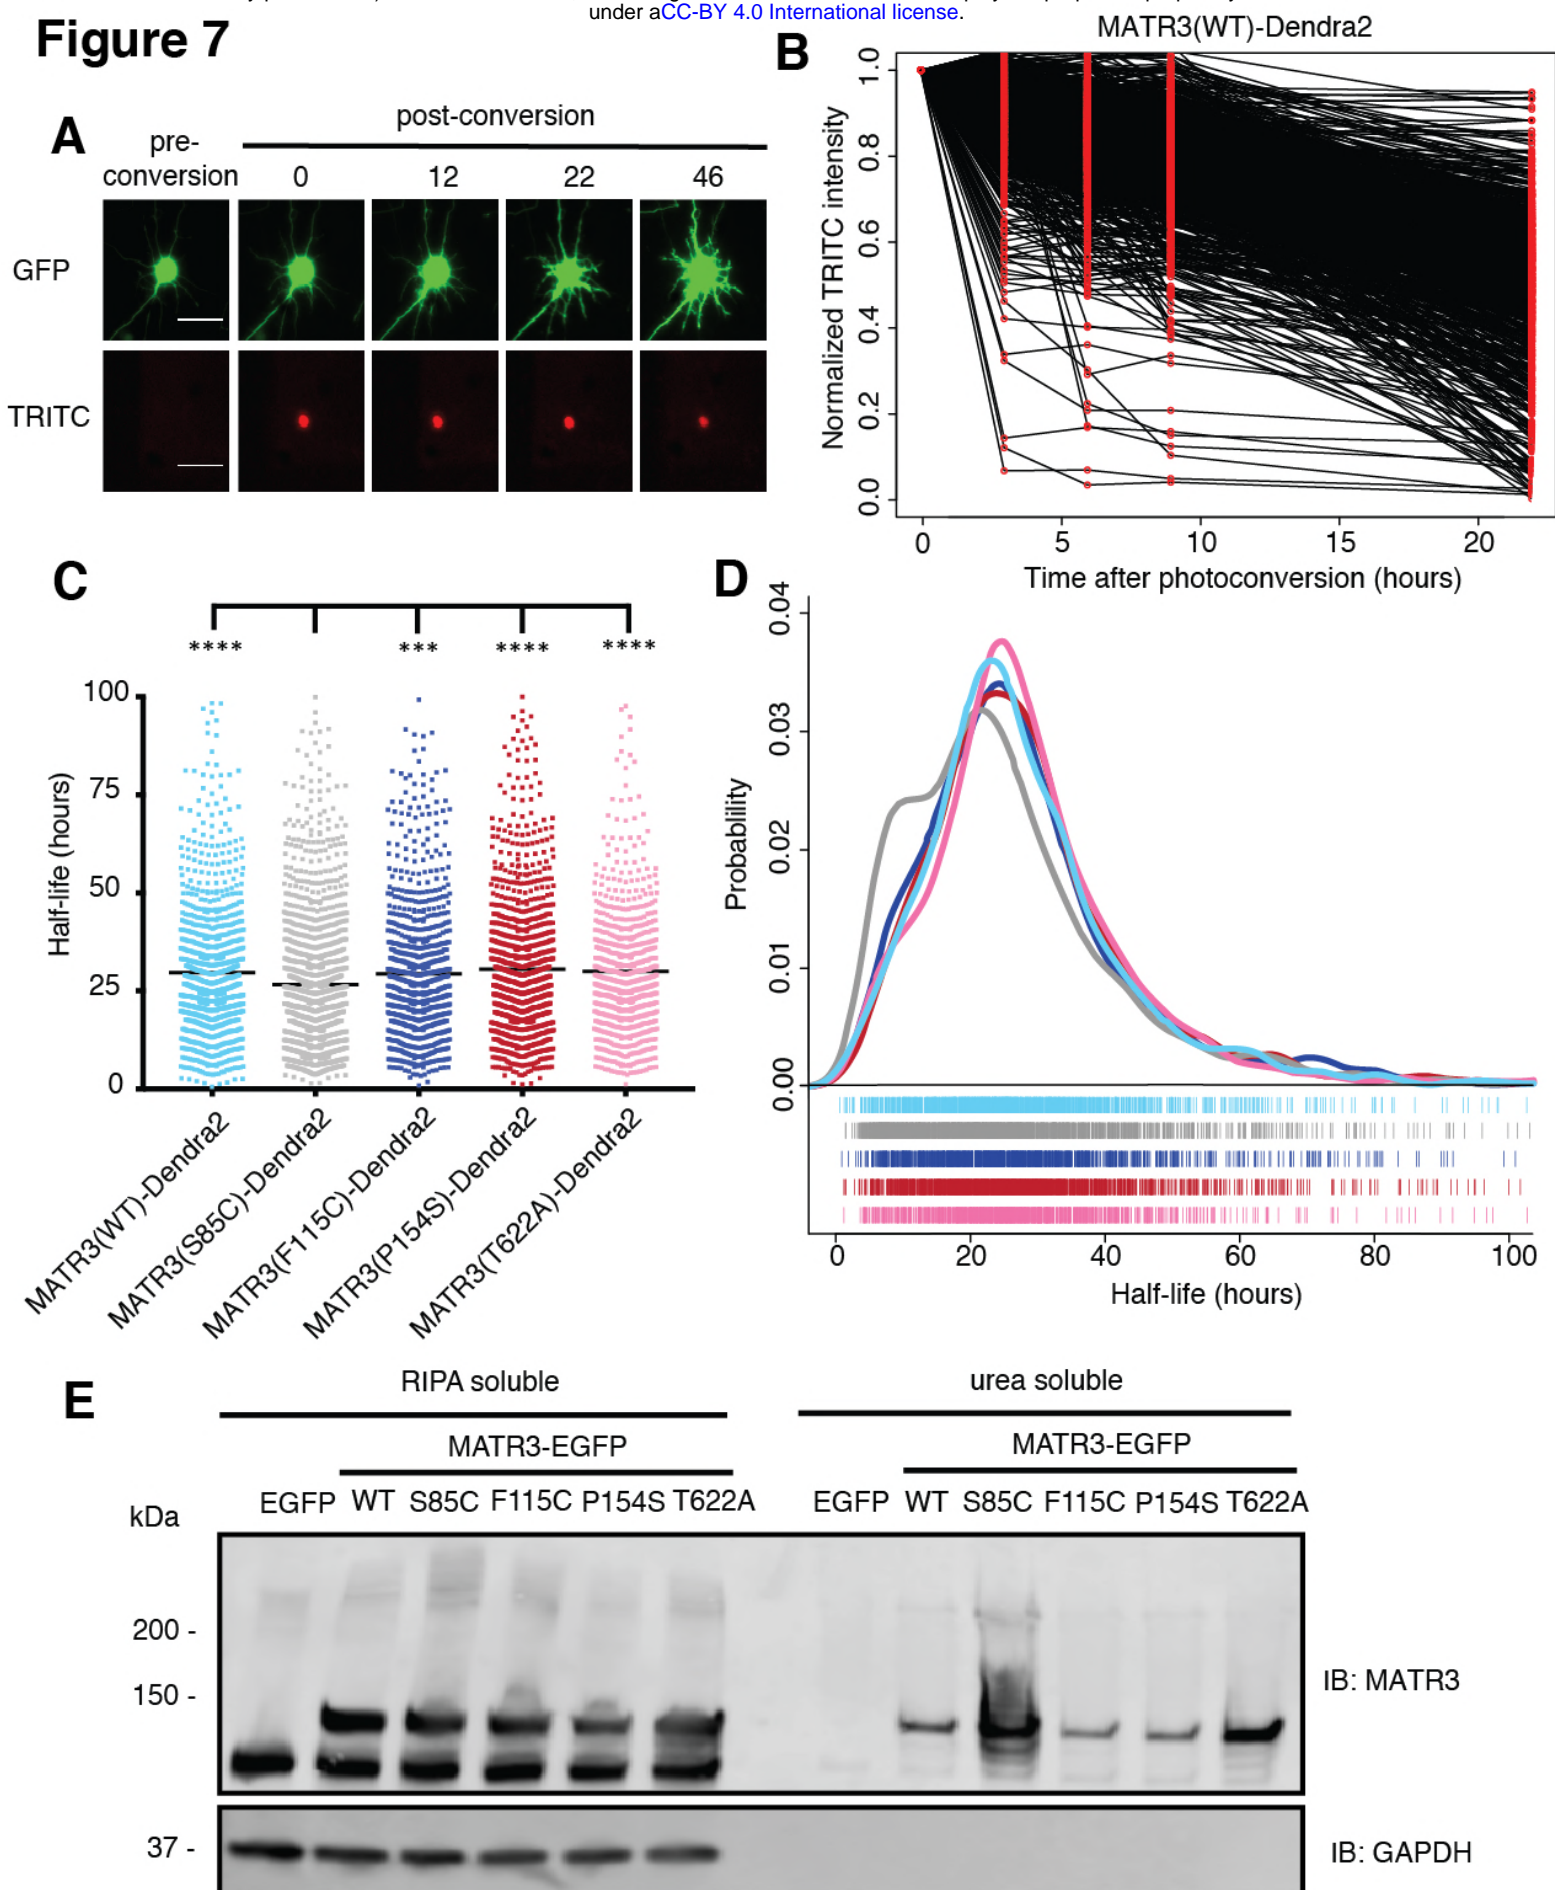

968 **FIGURE LEGENDS**

969 **Figure 1. MATR3 overexpression results in dose-dependent neurodegeneration. A.**

970 Diagram of MATR3 showing nucleic acid-binding domains as well as the distribution of  
971 pathogenic mutations implicated in ALS (blue), ALS/FTD (red), and ALS/distal myopathy  
972 (green) within domains predicted to be disordered by PONDR VSL2 (Peng et al., 2006).

973 **B.** Longitudinal fluorescence microscopy (LFM) allows unique identification and tracking  
974 of thousands of primary neurons (green outlines) transfected with fluorescent proteins,  
975 as well as monitoring of cell death (red outlines), indicated by loss of fluorescence signal  
976 and changes in morphology. Scale bar, 20  $\mu\text{m}$ . **C.** MATR3-EGFP expressing neurons

977 exhibited a higher risk of death compared to neurons expressing only EGFP, as  
978 quantified by the hazard ratio (HR) (HR = 1.48, EGFP n = 1286, MATR3-EGFP n =

979 1183;  $p < 2 \times 10^{-16}$ ; Cox proportional hazards). **D.** EGFP expressing cells were divided  
980 into three equal groups based off expression level. Increased survival was associated  
981 with higher expression levels of EGFP (comparing to medium expressers n = 428: low

982 expressers HR = 1.39, n = 429,  $p = 4.2 \times 10^{-5}$ ; high expressers HR = 0.79, n = 429,  $p =$   
983 0.024; Cox proportional hazards). **E.** Penalized spline modeling confirmed a protective

984 effect associated with higher EGFP expression that plateaus at ~1500 arbitrary units  
985 (AU); shaded colors represent low, medium and high expression ranges as in (**D**) ( $p =$

986  $5.3 \times 10^{-6}$ ; penalized spline regression). **F.** There were no significant differences in  
987 survival among neurons expressing low, medium, or high levels of MATR3-EGFP

988 (comparing to medium expressers n = 394: low expressers HR = 0.99, n = 394,  $p = 0.94$ ;  
989 high expressers HR = 1.06, n = 395,  $p = 0.54$ ; Cox proportional hazards). **G.** Similarly,

990 penalized spline analysis showed no relationship between expression and survival at low  
991 and medium expression but a significant increase in risk of death with high MATR3-

992 EGFP levels ( $p = 0.012$ ; penalized spline regression).

993

994 **Figure 2. Neurons are susceptible to both gain-of-function and loss-of-function**

995 **MATR3 toxicity. A.** In primary rodent cortical neurons, the S85C, F115, P154S, and

996 T622A disease-associated MATR3 mutants have the same granular nuclear distribution

997 as MATR3(WT)-EGFP. **B.** All four disease mutations display a subtle but significant

998 increase in toxicity compared to MATR3(WT)-EGFP (comparing to MATR3(WT)-EGFP n

999 = 2920; MATR3(S85C)-EGFP HR = 1.16, n = 2031, p =  $3.79 \times 10^{-6}$ ; MATR3(F115C)-

1000 EGFP HR = 1.14, n = 2144, p =  $5.57 \times 10^{-5}$ ; MATR3(P154S)-EGFP HR = 1.24, n = 2092,

1001 p =  $1.77 \times 10^{-11}$ ; MATR3(T622A)-EGFP HR = 1.14, n = 2137, p =  $6.02 \times 10^{-5}$ ; Cox

1002 proportional hazards). **C-D.** siRNA targeting the endogenous rat *Matr3* reduced MATR3

1003 antibody reactivity by approximately 65% (scrambled siRNA n = 576, anti-Matr3 siRNA n

1004 = 508, p < 0.0001; two-tailed t-test). **E.** Neurons transfected with anti-Matr3 siRNA

1005 displayed a higher risk of death compared to those transfected with scrambled siRNA

1006 (HR = 1.20, scrambled siRNA n = 2507, anti-Matr3 n = 2623, p =  $2.05 \times 10^{-8}$ ; Cox

1007 proportional hazards). Scale bars in **(A)**, 10  $\mu$ m; scale bars in **(C)**, 20  $\mu$ m.

1008

1009 **Figure 3. MATR3's ZFs mediate overexpression toxicity, and its RRM2 regulate**

1010 **subcellular distribution. A.** Schematic of MATR3 domain deletion mutants. **B.** Zinc

1011 finger (ZF) domain deletions do not change the localization of MATR3-EGFP compared

1012 to the full-length protein. **C.** ZF2 deletion, either in isolation or combination with ZF1,

1013 results in modest rescue of overexpression toxicity (comparing to MATR3(WT)-EGFP n

1014 = 1616: MATR3(dZF1)-EGFP HR = 0.94, n = 1471, p = 0.10; MATR3(dZF2)-EGFP HR

1015 = 0.93, n = 1505, p = 0.040; MATR3(dZF1/2)-EGFP HR = 0.90, n = 1104, p = 0.0093;

1016 Cox proportional hazards). **D.** While MATR3(dRRM1)-EGFP exhibits the same

1017 localization as MATR3(WT)-EGFP, deletion of RRM2 results in redistribution into

1018 intranuclear granules. **E.** RRM deletion had little effect on MATR3-mediated toxicity

1019 (comparing to MATR3(WT)-EGFP n = 1430: MATR3(dRRM1)-EGFP HR = 1.05, n =



1020 1171,  $p = 0.25$ ; MATR3(dRRM2)-EGFP HR = 1.09,  $n = 1001$ ,  $p = 0.066$ ;  
1021 MATR3(dRRM1/2)-EGFP HR = 1.04,  $n = 1180$ ,  $p = 0.42$ ). Scale bars in **(B)** and **(D)**, 10  
1022  $\mu\text{m}$ .  
1023  
1024 **Figure 4. MATR3(dRRM2)-EGFP and MATR3(dRRM1/2)-EGFP are highly neurotoxic**  
1025 **in their diffuse form. A.** Automated analysis of MATR3-EGFP distribution in transfected  
1026 primary cortical neurons. Regions of interest (ROIs) were drawn around the cell body  
1027 (marked by mApple fluorescence, red) and diffuse MATR3-EGFP (indicated by GFP  
1028 fluorescence, green), and used to calculate a coefficient of variation (CV) representing  
1029 MATR3-EGFP distribution within each ROI. **B.** Receiver operating characteristic (ROC)  
1030 curve for MATR3-EGFP CV values. A CV threshold of 0.92 (arrow) identified cells with  
1031 intranuclear MATR3-EGFP granules with 87.2% sensitivity and 93.9% specificity. **C.**  
1032 Using this cutoff, we determined that 1 day after transfection, 23.4% (653/2734) of  
1033 MATR3(dRRM2)-EGFP neurons displayed intranuclear granules compared to only 8.8%  
1034 (153/1743) of MATR3(dRRM1/2)-EGFP cells. ( $p < 0.00001$ ; Fisher's exact test). **D.**  
1035 Intranuclear granules form in a time-dependent manner in neurons expressing  
1036 MATR3(dRRM2)-EGFP and MATR3(dRRM1/2)-EGFP. **E-F.** Penalized spline models  
1037 depicting the relationship between MATR3(dRRM2)-EGFP expression on day 1 (**E**) or  
1038 change in GFP expression between day 1 and day 2 (**F**), and risk of developing an  
1039 intranuclear granule by day 3. Expression level at day 1 was not significantly associated  
1040 with risk of granule formation (**E**;  $p = 0.30$ ; penalized spline regression), but the relative  
1041 increase in expression from day 1 to day 2 is (**F**;  $p = 0.015$ ; penalized spline regression).  
1042 **G.** For MATR3(dRRM2)-EGFP, neurons exhibiting granules by day 1 displayed  
1043 improved survival compared to the pooled combination of all cells. Conversely, neurons  
1044 with diffusely distributed MATR3(dRRM2)-EGFP fared far worse (comparing to the  
1045 pooled condition: cells with granules  $n = 2081$ , HR = 0.86,  $p = 1.02 \times 10^{-5}$ ; cells with

1046 diffuse protein  $n = 653$ ,  $HR = 1.75$ ,  $p < 2 \times 10^{-16}$ ; Cox proportional hazards). **H.** Neurons  
1047 with MATR3(dRRM1/2)-EGFP granules by day 1 similarly displayed a reduced risk of  
1048 death in comparison to the pooled group, while diffuse MATR3(dRRM1/2)-EGFP was  
1049 highly toxic (comparing to the pooled condition: cells with granules  $n = 1590$ ,  $HR = 0.92$ ,  
1050  $p = 0.03$ ; cells with diffuse protein  $n = 153$ ,  $HR = 3.78$ ,  $p = 2 \times 10^{-16}$ ; Cox proportional  
1051 hazards). Scale bars in **(A)** and **(B)**,  $10 \mu\text{m}$ .

1052

1053 **Figure 5. MATR3(dRRM1/2)-EGFP droplets display liquid-like properties that are**  
1054 **affected by the S85C mutation. A.** MATR3(dRRM1/2)-EGFP and MATR3(dRRM1/2)-  
1055 EGFP droplets show liquid-like properties such as mobility and fusion. **B.** Pathogenic  
1056 MATR3 mutations on the dRRM1/2 background result in similar phase-separated  
1057 droplets. **C-D.** Fluorescence recovery after photobleaching (FRAP) of  
1058 MATR3(dRRM1/2)-EGFP droplets shows internal rearrangement consistent with liquid-  
1059 like behavior, but the recovery of MATR3(S85C dRRM1/2)-EGFP droplets was  
1060 significantly delayed. **E.** MATR3(S85C dRRM1/2)-EGFP droplets displayed significantly  
1061 higher viscosity in comparison to other variants (comparing to S85C MATR3(dRRM1/2)-  
1062 EGFP  $n = 5$ : WT MATR3(dRRM1/2)-EGFP  $n = 5$ ,  $p = 0.0045$ ; F115C MATR3(dRRM1/2)-  
1063 EGFP  $n = 5$ ,  $p = 0.0046$ ; P154S MATR3(dRRM1/2)-EGFP  $n = 5$ ,  $p = 0.0046$ ; T622A  
1064 MATR3(dRRM1/2)-EGFP  $n = 4$ ,  $p = 0.0079$ ; one-way ANOVA with Tukey's post-hoc  
1065 test). **F-G.** FRAP experiments involving full-length MATR3-EGFP variants showed no  
1066 differences in rates of return. **H.** Similarly, there were no differences in diffusion  
1067 coefficients (DC) among full-length MATR3 variants (MATR3(WT)-EGFP  $n = 5$ ,  
1068 MATR3(S85C)-EGFP  $n = 5$ , MATR3(F115C)-EGFP  $n = 5$ , MATR3(P154S)-EGFP  $n = 5$ ,  
1069 MATR3(T622A)-EGFP  $n = 4$ );  $p = 0.17$ ; one-way ANOVA). Scale bars in **(A)** and **(B)**,  $10$   
1070  $\mu\text{m}$ ; scale bars in **(C)** and **(F)**,  $5 \mu\text{m}$ .

1071

1072 **Figure 6. Reducing MATR3 nuclear localization mitigates overexpression toxicity.**  
1073 **A.** Schematic showing putative MATR3 nuclear localization signals (NLS). **B-C.** Deletion  
1074 of the N-terminal arm of NLS4 (dNLS4N) led to nuclear MATR3 clearance in neurons. **D.**  
1075 MATR3(dNLS4N)-EGFP forms granular structures in the cytoplasm and neuronal  
1076 processes (white arrows). **E.** Disrupting nuclear localization of MATR3 prevents  
1077 neurotoxicity from overexpression (MATR3(WT)-EGFP n = 2459; MATR3(dNLS4N)-  
1078 EGFP n = 1864, HR = 0.89, p = 0.00041; Cox proportional hazards). **F-G.** Pathogenic  
1079 MATR3 mutants display no difference in subcellular protein localization as assessed by  
1080 automated image nuclear/cytoplasmic analysis (**F**; MATR3(WT)-EGFP n = 824,  
1081 MATR3(S85C)-EGFP n = 499, MATR3(F115C)-EGFP n = 634, MATR3(P154S)-EGFP n  
1082 = 554, MATR3(T622A)-EGFP n = 677; p = 0.067; one-way ANOVA) or biochemical  
1083 fractionation in transfected HEK293T cells (**G**). Nevertheless, Western blot  
1084 demonstrated reduced abundance of the S85C mutant in transfected HEK293T cells.  
1085 Scale bars in (**B**) and (**C**), 10  $\mu\text{m}$ ; scale bar in (**D**), 50  $\mu\text{m}$ .

1086

1087 **Figure 7. Pathogenic MATR3 mutations have little effect on MATR3 turnover, but a**  
1088 **subset reduce solubility. A.** Optical pulse labeling of Dendra2-tagged MATR3 variants.  
1089 Each neuron is transfected with EGFP alone to outline the cell body, as well as MATR3-  
1090 Dendra2, which fluoresces in the red channel (TRITC) upon photoconversion. Scale bar,  
1091 50  $\mu\text{m}$ . **B.** Normalized red fluorescence (TRITC) signal for individual neurons. The time-  
1092 dependent decay of red fluorescence over time is used to calculate MATR3-Dendra2  
1093 half-life for each neuron. **C-D.** MATR3(S85C)-Dendra2 displayed a subtle but significant  
1094 reduction in half-life compared to MATR3(WT)-Dendra2 and the other pathogenic  
1095 mutants tested (comparing to MATR3(S85C)-Dendra2 n = 1670: MATR3(WT)-Dendra2,  
1096 n = 1269, p < 0.0001; MATR3(F115C)-Dendra2, n = 1122, p = 0.0001; MATR3(P154S)-

1097 Dendra2, n = 1509, p < 0.0001; MATR3(T622A)-Dendra2, n = 923, p < 0.0001; one-way  
1098 ANOVA with Tukey's post-hoc test). **E.** Sonication in RIPA resulted in equivalent  
1099 amounts of all MATR3 variants by Western blotting. The S85C variant was markedly  
1100 enriched in the RIPA-insoluble, urea-soluble fraction, while the T622A variant showed  
1101 more modest enrichment.
